# Supplementary material for: Inanspruchnahme von Palliativversorgung am Lebensende in Deutschland: zeitlicher Verlauf (2016–2019) und regionale Variabilität
Source: Springer Nature journal article supplement (doi:10.1007/s00103-023-03683-7), 2023-03-10
Supplement: MOESM1 [file 24608578]

Onlinematerial zum Beitrag:

## **Inanspruchnahme von Palliativversorgung am Lebensende in Deutschland: zeitlicher Verlauf (2016-2019) und regionale Variabilität**

Bianka Ditscheid<sup>1</sup>, Franziska Meissner<sup>1</sup>, Cordula Gebel<sup>2</sup>, Beata Hennig<sup>3</sup>, Ursula Marschall<sup>3</sup>, Winfried Meißner<sup>2</sup>, Ulrich Wedding<sup>2</sup>, Antje Freytag<sup>1</sup>

<sup>1</sup> Institut für Allgemeinmedizin, Universitätsklinikum Jena, Deutschland

<sup>2</sup> Abteilung Palliativmedizin der Klinik für Innere Medizin II, Universitätsklinikum Jena, Deutschland

<sup>3</sup> BARMER, Wuppertal, Deutschland

### **Korrespondenzadresse:**

PD Dr. Antje Freytag  
Institut für Allgemeinmedizin  
Universitätsklinikum Jena, Friedrich-Schiller-Universität Jena  
Bachstr. 18, 07743 Jena, Deutschland  
[Antje.Freytag@med.uni-jena.de](mailto:Antje.Freytag@med.uni-jena.de)

## Inhalt

|     |                                                                                                                                                                                                                             |    |
|-----|-----------------------------------------------------------------------------------------------------------------------------------------------------------------------------------------------------------------------------|----|
| A.  | eMETHODEN: Ergänzungen zur Methode.....                                                                                                                                                                                     | 4  |
| A.1 | Datenquellen .....                                                                                                                                                                                                          | 4  |
| A.2 | Ein- und Ausschlusskriterien .....                                                                                                                                                                                          | 4  |
| A.3 | Identifizierung der Inanspruchnahme der verschiedenen Formen von Palliativversorgung..                                                                                                                                      | 4  |
| A.4 | Weitere Kennzahlen mit Bezug zur Palliativversorgung .....                                                                                                                                                                  | 10 |
| A.5 | Datenaufbereitung .....                                                                                                                                                                                                     | 12 |
| A.6 | Statistische Analysen.....                                                                                                                                                                                                  | 13 |
|     | Deskriptive Analyse .....                                                                                                                                                                                                   | 13 |
|     | Mittlerer Zeittrend und regionale Abweichung vom mittleren Zeittrend .....                                                                                                                                                  | 13 |
|     | Variabilität .....                                                                                                                                                                                                          | 13 |
|     | Adjustierung der Inanspruchnahmeraten, des mittleren Zeittrends und der regionalen<br>Abweichung vom mittleren Zeittrend um versorgungsbedarfsbezogene Patienten- und<br>versorgungszugangsbezogene Wohnkreismerkmale ..... | 14 |
| A.7 | Unterschiede zur Publikation Ditscheid et al. 2020 .....                                                                                                                                                                    | 15 |
| B.  | eERGEBNISSE: Ergänzungen zu den Ergebnissen .....                                                                                                                                                                           | 17 |
| C.  | eDiskussion: Ergänzungen zur Diskussion .....                                                                                                                                                                               | 30 |
| C.1 | Stärken und Schwächen .....                                                                                                                                                                                                 | 30 |
|     | Literatur.....                                                                                                                                                                                                              | 31 |

## Tabellenverzeichnis

|                                                                                                                                                                                            |    |
|--------------------------------------------------------------------------------------------------------------------------------------------------------------------------------------------|----|
| Tabelle A-1: Regional gültige Abrechnungsziffern für AAPV-Leistungen .....                                                                                                                 | 5  |
| Tabelle A-2: Regional gültige Sonderziffern für SAPV-Leistungen .....                                                                                                                      | 7  |
| Tabelle A-3: Beschreibung der weiteren Kennzahlen mit Bezug zur Palliativversorgung.....                                                                                                   | 10 |
| Tabelle A-4: Potenziell palliativversorgungsrelevante chronische Grunderkrankungen <sup>#</sup> .....                                                                                      | 14 |
| Tabelle B-1: Studienpopulation je Jahr und KV: Verstorbene BARMER-Versicherte (n) und deren Anteil (%) innerhalb der Studienpopulation .....                                               | 17 |
| Tabelle B-2: Patientenmerkmale, aggregiert über Jahre und KVen (alters- und geschlechtsstandardisiert) .....                                                                               | 17 |
| Tabelle B-3: Studienpopulation vs. alle Sterbefälle je Bundesland im gesamten Zeitraum 2016-2019                                                                                           | 18 |
| Tabelle B-4: Patientenmerkmale (außer Grunderkrankungen) je KV, über alle Jahre hinweg (alters- und geschlechtsstandardisiert) .....                                                       | 18 |
| Tabelle B-5: Patientenmerkmale (nur Grunderkrankungen) je KV, über alle Jahre hinweg (alters- und geschlechtsstandardisiert) .....                                                         | 20 |
| Tabelle B-6: Versorgungszugangs-bezogene Wohnkreismerkmale je KV .....                                                                                                                     | 21 |
| Tabelle B-7: Inanspruchnahme der Hauptversorgungsformen im Jahr 2019 und 2016 (alters- und geschlechtsstandardisiert) .....                                                                | 22 |
| Tabelle B-8: Inanspruchnahmeraten weiterer ausgewählter Indikatoren <sup>#</sup> für die Inanspruchnahme von Palliativversorgung im Jahr 2019 und 2016 – Teil A.....                       | 24 |
| Tabelle B-9: Inanspruchnahmeraten weiterer ausgewählter Indikatoren <sup>#</sup> für die Inanspruchnahme von Palliativversorgung im Jahr 2019 und 2016 – Teil B.....                       | 25 |
| Tabelle B-10: Odds Ratios der Kovariaten, die zur Adjustierung der Daten 2019 herangezogen wurden (einfache Regression mit Inanspruchnahme von PV insgesamt als abhängiger Variable) ..... | 27 |
| Tabelle B-11: Adjustierter zeitlicher Trend in den Inanspruchnahmeraten gemittelt über alle KVen sowie adjustierte KV-spezifische Abweichung vom mittleren Trend <sup>#</sup> .....        | 28 |

## A. eMETHODEN: Ergänzungen zur Methode

### A.1 Datenquellen

Für die Analysen haben wir pseudonymisierte Versicherten (VS)-Stammdaten (Geburtsjahr, Geschlecht, Kreiskennzeichen, Versicherungsbeginn, Versicherungsende, Todesdatum), Leistungs- und Diagnosedaten aus den Bereichen ambulante vertragsärztliche Versorgung (§§ 294, 295 SGB V), Krankenhausversorgung (§ 301 SGB V), häusliche Krankenpflege (HKP, § 302 SGB V) und stationäre Hospizleistungen (§ 39a SGB V) herangezogen.

Wir ergänzten diese Daten um ausgewählte Regionsmerkmale auf Kreisebene. So spielten wir einen Kennwert für die sozioökonomische Deprivation aller 401 deutschen Kreise im Jahr 2019 zu (German Index of Socioeconomic Deprivation, GISD [1]). Dieser Deprivationsindex fasst neun Indikatoren aus drei Dimensionen sozialer Ungleichheit (Bildung, Beruf, Einkommen) zusammen und variiert zwischen 0 und 1 (hohe Werte = hohe Deprivation). Darüber hinaus haben wir einen Kennwert aus den Indikatoren und Karten zur Raum- und Stadtentwicklung zugespielt [2]: den Anteil ländlich lebender Einwohner je Kreis, der je Kreis angibt, wie groß der Anteil der Einwohner in Gemeinden mit einer Bevölkerungsdichte unter 150 Einwohner/km<sup>2</sup> ist. Der Wert geht als relative Häufigkeit in die Analysen ein und variiert entsprechend zwischen 0 und 1. Die deskriptiven Ergebnisse wurden der besseren Lesbarkeit wegen in Prozent ausgegeben.

Zur Berechnung der im Rahmen der Alters- und Geschlechtsstandardisierung notwendigen Gewichte haben wir außerdem Sterbefallstatistiken je 5-Jahres-Altersgruppe, Geschlecht, Bundesland der Gesundheitsberichterstattung des Bundes für die Jahre 2016, 2017, 2018 und 2019 herangezogen [3].

### A.2 Ein- und Ausschlusskriterien

Primäres Einschlusskriterium war ein Todesdatum in den Jahren 2016 bis 2019. Das Datenfeld ‚Todesdatum‘ wurde von der Krankenkasse zur Verfügung gestellt (aggregiertes Datenfeld aus ‚Versicherungsende‘ und ‚Austrittsgrund Tod‘). Weitere Einschlusskriterien waren ein Alter von mind. 19 Jahren zum Zeitpunkt des Todes, eine vor dem Tod mind. einjährige durchgängige Versicherung bei der datenbereitstellenden Krankenkasse sowie die Verfügbarkeit der Wohnortinformation (Kreiskennzeichen). Frühere Versicherte der Deutschen BKK, die in den Jahren 2016 bis 2018 verstorben sind, haben wir ausgeschlossen, da für diese keine vollständige Datenverfügbarkeit gewährleistet werden konnte.

### A.3 Identifizierung der Inanspruchnahme der verschiedenen Formen von Palliativversorgung

Im vorliegenden Projekt haben wir auch nachlaufende Leistungsabrechnungen (Abrechnungen nach dem Tod) berücksichtigt [4, 5]. Aus diesem Grund ist eine weitere Fortschreibung der Zeitreihe über das Jahr 2019 hinaus erst zu einem späteren Zeitpunkt möglich.

### Allgemeine Ambulante Palliativversorgung (AAPV)

Die AAPV-Inanspruchnahme haben wir in erster Linie über die bundesweit gültigen Gebührenordnungspositionen (GOP) des Einheitlichen Bewertungsmaßstabs (EBM) für Ärzte<sup>1</sup> 03370/04370 (Palliativmedizinische Ersterhebung des Patientenstatus inkl. Behandlungsplan), 03371/04371 (Zuschlag zu der Versichertenpauschale 03000/04000 für die palliativmedizinische Betreuung des Patienten in der Arztpraxis), 03372/04372 (Zuschlag zu den Gebührenordnungspositionen 01410 oder 01413 für die palliativmedizinische Betreuung in der Häuslichkeit) und 03373/04373 (Zuschlag zu den Gebührenordnungspositionen 01411, 01412 oder 01415 für die palliativmedizinische Betreuung in der Häuslichkeit) erfasst. Diese GOP sind ausschließlich von Haus- und Kinderärzten abrechenbar. Onkologen können laut Onkologie-Vereinbarung [6] bundesweit die Palliativziffer 86518 (Palliativversorgung von Tumorpatienten; ggf. mit Zusatz I (Brandenburg), P (Westfalen-Lippe) oder Z (Berlin)) bzw. für Thüringen und Sachsen die Palliativziffer 96509 (Palliativversorgung von Tumorpatienten) abrechnen. Darüber hinaus recherchierten wir weitere, je Kassenärztliche Vereinigung (KV) gültige Ziffern für AAPV-Leistungen in öffentlich zugänglichen Quellen<sup>2</sup>, siehe Tabelle A-1.

**Tabelle A-1: Regional gültige Abrechnungsziffern für AAPV-Leistungen**

| KV-Region                                                                     | GOP           | Bezeichnung GOP                                                                                                                           |
|-------------------------------------------------------------------------------|---------------|-------------------------------------------------------------------------------------------------------------------------------------------|
| <i>Palliativmedizinische Leistungen aus HzV-Verträgen (gemäß § 73b SGB V)</i> |               |                                                                                                                                           |
| Nordrhein, Hessen, Westfalen-Lippe, Bayern, Berlin, Sachsen, Saarland         | 00001         | Kontaktabhängige Pauschale für die hausärztliche Betreuung von Palliativpatienten                                                         |
|                                                                               | 01490         | Zuschlag für Besuche von Palliativpatienten                                                                                               |
| Nordrhein, Westfalen-Lippe                                                    | 01411P        | Ungeplanter eiliger Besuch (Palliativpatient)                                                                                             |
| Nordrhein, Hessen, Bayern, Saarland, Westfalen-Lippe                          | 01417         | Besuch durch eine VERAH (Palliativpatient)                                                                                                |
| Nordrhein, Westfalen-Lippe, Hessen, Bayern, Saarland                          | 03374         | Höchstwert für die GOP 03372                                                                                                              |
| Hessen, Bayern, Saarland                                                      | 04374         | Höchstwert für die GOP 04372                                                                                                              |
| Bayern                                                                        | 03371H        | Zuschlag für die palliativmedizinische Betreuung eines HZV-Patienten in der Arztpraxis in Bayern                                          |
|                                                                               | 03372H        | Zuschlag für die palliativmedizinische Betreuung eines HZV-Patienten in der Häuslichkeit in Bayern                                        |
|                                                                               | 03373H        | Zuschlag für die dringliche palliativmedizinische Betreuung eines HZV-Patienten in der Häuslichkeit in Bayern                             |
| Bayern                                                                        | 3730(B/C/D/E) | Rufbereitschaft am Lebensende (genehmigungspflichtig, Nachweis über Teilnahme Kurs-Weiterbildung Palliativmedizin für Ärzte (40 Stunden)) |
| Hessen                                                                        | 98984         | Kennzeichnung palliativmedizinische ambulante Versorgung                                                                                  |

<sup>1</sup> Für eine bessere Lesbarkeit haben wir nur eine sprachliche Form genutzt; hierbei sind Angehörige aller Geschlechter eingeschlossen.

<sup>2</sup> Recherche anhand der Internet-Auftritte der Kassenärztlichen Vereinigungen und der regionalen Hausärzterverbände, z.T. ergänzt durch Anschreiben und Telefonate; die BARMER stellte ebenfalls Ziffern bereit.

| KV-Region                                                                                         | GOP    | Bezeichnung GOP                                                                                                                                                                               |
|---------------------------------------------------------------------------------------------------|--------|-----------------------------------------------------------------------------------------------------------------------------------------------------------------------------------------------|
| <i>Palliativmedizinische Leistungen aus sonstigen Selektivverträgen (gemäß § 140a SGB V u.ä.)</i> |        |                                                                                                                                                                                               |
| Nordrhein<br>(Palliativvertrag<br>Ersatzkassen)                                                   | 91100  | Pauschale HA/FA Eingangsdiagnostik                                                                                                                                                            |
|                                                                                                   | 91101  | Pauschale HA/FA zus. Aufwand Betreuung Pat./Ang. Vor Ort, Überprüfung Schmerzth. Koord., je nach Hausbes. 01410-01413, 01415                                                                  |
|                                                                                                   | 91102  | HA/FA: Koordinationspauschale, je Quartal                                                                                                                                                     |
|                                                                                                   | 91103  | HA/FA: Telefonisches Konsil mit QPA und/oder amb. Pflegedienst                                                                                                                                |
|                                                                                                   | 91110  | QPA: Bereitschaftspauschale (Rund-um-die-Uhr-Erreichbarkeit)                                                                                                                                  |
|                                                                                                   | 91111  | QPA: Pauschale für eine vom HA angeforderte fernmündliche palliativmed. Beratung, je Konsilium                                                                                                |
|                                                                                                   | 91112  | QPA: Pauschale für QPA bei angef. Besuch durch HA/FA zur Vermeidung stat. KH-Beh. je 01410-01413, 01415                                                                                       |
|                                                                                                   | 01410B | Besuch eines Kranken, wegen der Erkrankung ausgeführt                                                                                                                                         |
|                                                                                                   | 01411B | Dringender Besuch wegen der Erkrankung, unverzüglich nach Bestellung ausgeführt                                                                                                               |
|                                                                                                   | 01412B | Dringender Besuch / dringende Visite auf der Belegstation wegen der Erkrankung, unverzüglich nach Bestellung ausgeführt                                                                       |
|                                                                                                   | 01413B | Besuch eines weiteren Kranken in derselben sozialen Gemeinschaft (z. B. Familie) und/oder in beschützenden Wohnheimen bzw. Einrichtungen bzw. Pflege- oder Altenheimen mit Pflegepersonal     |
|                                                                                                   | 01415B | Dringender Besuch eines Patienten in beschützenden Wohnheimen bzw. Einrichtungen bzw. Pflege- oder Altenheimen mit Pflegepersonal wegen der Erkrankung, noch am Tag der Bestellung ausgeführt |
|                                                                                                   | 90200A | Palliativmedizin Wegegebühr PCK und EKK, Wegepauschale bis 2 DKM bei Tag                                                                                                                      |
|                                                                                                   | 90201A | Wegegebühr PCK und EKK, Wegegeld pro DKM einfacher Besuch bei Tage                                                                                                                            |
|                                                                                                   | 90202A | Palliativmedizin Wegegebühr PCK und EKK, Wegegeld pro DKM dringender Besuch bei Tage                                                                                                          |
|                                                                                                   | 90203A | Palliativmedizin Wegegebühr PCK und EKK, Wegepauschale bis 2 DKM bei Nacht                                                                                                                    |
|                                                                                                   | 90204A | Wegegebühr PCK und EKK, Wegegeld pro DKM dringender Besuch bei Nacht                                                                                                                          |
| Westfalen-Lippe<br>(Palliativvertrag<br>nach § 132d SGB V<br>vom 01.07.2013)                      | 91501  | HA/FA: Pauschale für die Eingangsdiagnostik                                                                                                                                                   |
|                                                                                                   | 91502  | HA/FA: Zuschlag für einen erforderlichen Hausbesuch mit patientenbezogenem Zeitumfang von bis zu 45 Minuten (neben GOP 01410, 01411, 01412, 01415)                                            |
|                                                                                                   | 91502S | HA/FA: Zuschlag für einen erforderlichen Hausbesuch mit patientenbezogenem Zeitumfang von mehr als 45 Minuten (neben GOP 01410, 01411, 01412, 01415)                                          |
|                                                                                                   | 91503  | HA/FA: Patientenbezogener persönlicher Austausch des koordinierenden Haus-/Facharztes mit einem Palliativarzt des PKD                                                                         |

| KV-Region | GOP    | Bezeichnung GOP                                                                                                                     |
|-----------|--------|-------------------------------------------------------------------------------------------------------------------------------------|
|           | 91504  | HA/FA: Zuschlag für einen erforderlichen Hausbesuch mit patientenbezogenem Zeitumfang von bis zu 45 Minuten (neben GOP 01413)       |
|           | 91504S | HA/FA: Zuschlag für einen erforderlichen Hausbesuch mit patientenbezogenem Zeitumfang von mehr als 45 Minuten (neben GOP 01413)     |
|           | 91505  | HA/FA: Zuschlag für die Vorhaltung einer telefonischen Erreichbarkeit und/oder einer Besuchsbereitschaft des koordinierenden Arztes |
|           | 92002  | HA/FA: Hospizpatient: Zuschlag bei Besuch eines Patienten in stationärem Hospiz (neben GOP 01410, 01411, 01412)                     |
|           | 92003  | HA/FA: Hospizpatient: Zuschlag bei Besuch weiterer Patienten in stationärem Hospiz (neben GOP 01413)                                |

### **Besonders Qualifizierte und Koordinierte Palliativmedizinische Versorgung (BQKPMV)**

Die BQKPMV-Inanspruchnahme identifizierten wir über die bundesweit gültigen EBM-GOP 37300 (Palliativmedizinische Ersterhebung), 37302 (Koordinationspauschale), 37305 (Palliativmedizinische Betreuung von Patienten in der Häuslichkeit), 37306 (Dringender Besuch eines Palliativpatienten in der Häuslichkeit), 37314 (Konsiliarische Erörterung durch Arzt mit der Zusatzbezeichnung Palliativmedizin), 37317 (Telefonische Erreichbarkeit und Besuchsbereitschaft in kritischen Phasen), 37318 (Telefonische Beratung von mindestens 5 Minuten Dauer) und 37320 (Fallkonferenz gemäß Vereinbarung zur Palliativversorgung (Anlage 30 zum BMV-Ä)).

### **Spezialisierte Ambulante Palliativversorgung (SAPV)**

Für die Erfassung der SAPV-Inanspruchnahme zogen wir die bundesweit gültigen EBM-GOP für die Verordnung von SAPV 01425 (Erstverordnung) und 01426 (Folgeverordnung) heran. Des Weiteren stellte uns die BARMER eine Sondertabelle mit SAPV-Leistungsabrechnungen zur Verfügung. Diese entstammt den HKP-Daten und enthielt die SAPV-Leistungen überwiegend in Form der 10-stelligen Positionsnummer [7]. Darüber hinaus gibt es regional gültige Sonderziffern, die wir in den amb-GOP-Daten identifizierten (Tabelle A-2). Die SAPV-GOP für Berlin sind erst seit 2019 regulär in den amb-GOP-Daten verfügbar. Deshalb stellte uns die BARMER für die Jahre 2016-2018 eine Sondertabelle mit SAPV-GOP aus Berlin zur Verfügung.

**Tabelle A-2: Regional gültige Sonderziffern für SAPV-Leistungen**

| KV        | GOP   | Bezeichnung GOP                                                            |
|-----------|-------|----------------------------------------------------------------------------|
| Nordrhein | 92150 | Tel./pers. Gespräch mit Betroffenen (Patienten oder deren Angehörigen)     |
|           | 92151 | Tel./pers. Gespräch mit an der Versorgung teilnehmendem Arzt außerhalb PCT |
|           | 92153 | Koordinationspauschale                                                     |
|           | 92154 | Assessmentpauschale                                                        |
|           | 92155 | Teilversorgung je Pat. und je Einsatz ärztlich sowie pflegerisch           |
|           | 92157 | Vollständige Versorgung je Pat. und je BHT                                 |
| Berlin    | 99060 | Beratung des behandelnden Hausarztes                                       |
|           | 99061 | Beratung des/der Versicherten u./o. dessen Angehörigen                     |

| KV              | GOP    | Bezeichnung GOP                                                                                                                |
|-----------------|--------|--------------------------------------------------------------------------------------------------------------------------------|
|                 | 99062  | Beratung der ausführenden SAPV-Pflegekraft                                                                                     |
|                 | 99063  | Koordination                                                                                                                   |
|                 | 99064  | Additiv unterstützende Teilversorgung                                                                                          |
|                 | 99065  | Vollständige Versorgung                                                                                                        |
|                 | 99066  | Hospizwochenpauschale                                                                                                          |
|                 | 99067  | HB-Zuschlag für SAPV-Assistenten (Besuch, incl. Wegegelder)                                                                    |
|                 | 99068  | HB-Zuschlag zur SNR 99067 für SAPV-Assistenten zu "Unzeiten", Mo-Sa, 19-07 Uhr                                                 |
|                 | 99069  | HB-Zuschlag zur SNR 99067 für SAPV-Assistenten zu "Unzeiten", So & Feiertage                                                   |
| Westfalen-Lippe | 91512  | QPA: Pauschale für einen erforderlichen Hausbesuch mit patientenbezogenem Zeitumfang von bis zu 45 Minuten (neben GOP 01410)   |
|                 | 91512S | QPA: Pauschale für einen erforderlichen Hausbesuch mit patientenbezogenem Zeitumfang von mehr als 45 Minuten (neben GOP 01410) |
|                 | 91512T | QPA: Pauschale für einen erforderlichen Hausbesuch mit patientenbezogenem Zeitumfang von mehr als 90 Minuten (neben GOP 01410) |
|                 | 91513  | QPA: Pauschale für einen erforderlichen Hausbesuch mit patientenbezogenem Zeitumfang von bis zu 45 Minuten (neben GOP 01411)   |
|                 | 91513S | QPA: Pauschale für einen erforderlichen Hausbesuch mit patientenbezogenem Zeitumfang von mehr als 45 Minuten (neben GOP 01411) |
|                 | 91513T | QPA: Pauschale für einen erforderlichen Hausbesuch mit patientenbezogenem Zeitumfang von mehr als 90 Minuten (neben GOP 01411) |
|                 | 91514  | QPA: Pauschale für einen erforderlichen Hausbesuch mit patientenbezogenem Zeitumfang von bis zu 45 Minuten (neben GOP 01412)   |
|                 | 91514S | QPA: Pauschale für einen erforderlichen Hausbesuch mit patientenbezogenem Zeitumfang von mehr als 45 Minuten (neben GOP 01412) |
|                 | 91514T | QPA: Pauschale für einen erforderlichen Hausbesuch mit patientenbezogenem Zeitumfang von mehr als 90 Minuten (neben GOP 01412) |
|                 | 91515  | QPA: Zuschlag für Punktionen                                                                                                   |
|                 | 91518  | QPA: Pauschale für einen erforderlichen Hausbesuch mit patientenbezogenem Zeitumfang von bis zu 45 Minuten (neben GOP 01415)   |
|                 | 91518S | QPA: Pauschale für einen erforderlichen Hausbesuch mit patientenbezogenem Zeitumfang von mehr als 45 Minuten (neben GOP 01415) |
|                 | 91518T | QPA: Pauschale für einen erforderlichen Hausbesuch mit patientenbezogenem Zeitumfang von mehr als 90 Minuten (neben GOP 01415) |
|                 | 91519  | QPA: Pauschale für einen erforderlichen Hausbesuch mit patientenbezogenem Zeitumfang von bis zu 45 Minuten (neben GOP 01413)   |



| KV | GOP    | Bezeichnung GOP                                                                                                                |
|----|--------|--------------------------------------------------------------------------------------------------------------------------------|
|    | 91519S | QPA: Pauschale für einen erforderlichen Hausbesuch mit patientenbezogenem Zeitumfang von mehr als 45 Minuten (neben GOP 01413) |
|    | 91519T | QPA: Pauschale für einen erforderlichen Hausbesuch mit patientenbezogenem Zeitumfang von mehr als 90 Minuten (neben GOP 01413) |
|    | 92010  | QPA: Hospizpatient: Durchführung palliativmedizinisches Assessment                                                             |
|    | 92012  | QPA: Hospizpatient: Besuch eines Patienten in einem stationären Hospiz (neben GOP 01410)                                       |
|    | 92013  | QPA: Hospizpatient: Besuch eines Patienten in einem stationären Hospiz (neben GOP 01411)                                       |
|    | 92014  | QPA: Hospizpatient: Besuch eines Patienten in einem stationären Hospiz (neben GOP 01412)                                       |
|    | 92015  | QPA: Hospizpatient: Zuschlag für Punktionen                                                                                    |
|    | 92016  | QPA: Hospizpatient: Besuch weiterer Patienten in einem stationären Hospiz (neben GOP 01413)                                    |
|    | 91511  | PKD: Pauschale für die Koordinierung der Versorgung                                                                            |
|    | 91516  | PKD: Pauschale für SAPV-Vollversorgung bis 14 Tage                                                                             |
|    | 91517  | PKD: Pauschale für SAPV-Vollversorgung ab 15 Tage                                                                              |
|    | 91520  | PKD: Durchführung eines Erstassessments                                                                                        |
|    | 91521  | Zuschlag zur SNR 91520 für die Anfahrt bei einer Entfernung von über 25 Kilometern (einfache Strecke)                          |
|    | 91522  | Zuschlag zur SNR 91520 für die Anfahrt bei einer Entfernung von über 50 Kilometern (einfache Strecke)                          |
|    | 92011  | PKD: Hospizpatient: Koordinations- und Bereitschaftspauschale                                                                  |

### **Stationäre Palliativversorgung (stationäre PV)**

Die stationäre PV im Krankenhaus identifizierten wir zum einen über die Operationen- und Prozedurenschlüssel (OPS) für palliative Leistungen im Krankenhaus 8-982 (Palliativmedizinische Komplexbehandlung), 8-98e (Spezialisierte stationäre palliativmedizinische Komplexbehandlung) und 8-98h (Spezialisierte palliativmedizinische Komplexbehandlung durch einen Palliativdienst) in den Krankenhaus-OPS-Daten. Zum anderen identifizierten wir Zusatzentgelte besonderer Einrichtungen in den Krankenhaus-Entgelt-Tabellen. Hierbei zogen wir sowohl bundesweit als auch auf Bundesland-Ebene im Studienzeitraum gültige, tages- oder fallbezogene, voll- und teilstationäre Entgelte für palliative Leistungen heran (recherchiert unter <https://kh-entgeltschluessel.gkv-datenaustausch.de/>).

### **Hospiz**

In Anspruch genommene stationäre Hospizleistungen identifizierten wir in der entsprechenden Leistungstabelle über den „Zuschuss stationäre Hospizbehandlung“. Die Versorgung durch ambulante Hospizdienste konnte nicht berücksichtigt werden, da diese in den Krankenkassen-Routinedaten nicht auf Versichertenebene dokumentiert wird.

### **Palliativversorgung insgesamt**

Als VS mit PV insgesamt haben wir diejenigen VS ausgewiesen, die im letzten Lebensjahr mindestens eine der o.g. palliativen Versorgungsformen (AAPV, BQKPmV, SAPV, stationäre PV, Hospiz) in Anspruch genommen haben.

## **A.4 Weitere Kennzahlen mit Bezug zur Palliativversorgung**

Neben den o.g. palliativen Versorgungsformen haben wir weitere Kennzahlen gebildet, um die in Anspruch genommene PV näher betrachten zu können (Tabelle A-3).

**Tabelle A-3: Beschreibung der weiteren Kennzahlen mit Bezug zur Palliativversorgung**

| <b>Kennzahl</b>                            | <b>Erläuterung</b>                                                                                                                                                                                                                                                                                                                                                                                                                                                                                                                                                                                                                                                                                                                                                                                                     |
|--------------------------------------------|------------------------------------------------------------------------------------------------------------------------------------------------------------------------------------------------------------------------------------------------------------------------------------------------------------------------------------------------------------------------------------------------------------------------------------------------------------------------------------------------------------------------------------------------------------------------------------------------------------------------------------------------------------------------------------------------------------------------------------------------------------------------------------------------------------------------|
| <b>Palliativversorgung insgesamt</b>       |                                                                                                                                                                                                                                                                                                                                                                                                                                                                                                                                                                                                                                                                                                                                                                                                                        |
| PV nur Bundesziffern                       | Inanspruchnahme mindestens einer der folgenden Leistungen: <ul style="list-style-type: none"> <li>- AAPV nach EBM,</li> <li>- BQKPmV,</li> <li>- SAPV-Verordnung,</li> <li>- palliative OPS (Krankenhaus),</li> <li>- stationäres Hospiz.</li> </ul> Versicherte, deren PV ausschließlich über Selektivverträge (AAPV, SAPV) oder Zusatzentgelte für besondere Einrichtungen (stationäre PV) abgerechnet wurde oder die ausschließlich eine SAPV-Leistung (ohne SAPV-Verordnung, aber ggf. mit SAPV-Verordnung aus dem Krankenhaus) hatten, werden hier nicht erfasst. Mit dieser Kennzahl soll eine Annäherung an den Aufgriff von palliativ versorgten Versicherten aus anderen Routinedaten-basierten Publikationen zur Inanspruchnahme von PV und somit Vergleichbarkeit mit deren Ergebnissen hergestellt werden. |
| PV inkl. geriatrischer Leistung            | Inanspruchnahme von mindestens einer der folgenden Leistungen: <ul style="list-style-type: none"> <li>- AAPV</li> <li>- BQKPmV</li> <li>- SAPV</li> <li>- Stationäre PV</li> <li>- Hospiz</li> <li>- Geriatrische Leistung (s.u.)</li> </ul>                                                                                                                                                                                                                                                                                                                                                                                                                                                                                                                                                                           |
| <b>AAPV</b>                                |                                                                                                                                                                                                                                                                                                                                                                                                                                                                                                                                                                                                                                                                                                                                                                                                                        |
| AAPV oder BQKPmV                           | Inanspruchnahme von AAPV- oder BQKPmV-Leistungen (s.o. AAPV, BQKPmV). Weitere Versorgungsformen blieben unberücksichtigt.                                                                                                                                                                                                                                                                                                                                                                                                                                                                                                                                                                                                                                                                                              |
| maxAAPV oder maxBQKPmV                     | Inanspruchnahme von maximal AAPV- bzw. maximal BQKPmV-Leistungen, aber keine SAPV-Leistungen. Weitere Versorgungsformen blieben unberücksichtigt.                                                                                                                                                                                                                                                                                                                                                                                                                                                                                                                                                                                                                                                                      |
| PV gemäß Onkologie-Vereinbarung            | Abrechnung der Palliativziffer nach Onkologie-Vereinbarung [6] (s.o. AAPV): <ul style="list-style-type: none"> <li>- GOP 86518 (alle KVen außer Sachsen und Thüringen)</li> <li>- GOP 96509 (KVen Sachsen und Thüringen)</li> </ul>                                                                                                                                                                                                                                                                                                                                                                                                                                                                                                                                                                                    |
| Geriatrische Leistung, keine AAPV-Leistung | Abrechnung mindestens einer der folgenden geriatrischen Leistungskomplexe: <ul style="list-style-type: none"> <li>- EBM-GOP 03360 (Hausärztlich geriatrisches Basisassessment),</li> </ul>                                                                                                                                                                                                                                                                                                                                                                                                                                                                                                                                                                                                                             |

| Kennzahl                        | Erläuterung                                                                                                                                                                                                                                                                                                                                                                                                                                                                                                                                                                                                                                                                                                                                                                                                                                                                                                                                                             |
|---------------------------------|-------------------------------------------------------------------------------------------------------------------------------------------------------------------------------------------------------------------------------------------------------------------------------------------------------------------------------------------------------------------------------------------------------------------------------------------------------------------------------------------------------------------------------------------------------------------------------------------------------------------------------------------------------------------------------------------------------------------------------------------------------------------------------------------------------------------------------------------------------------------------------------------------------------------------------------------------------------------------|
|                                 | <ul style="list-style-type: none"> <li>- EBM-GOP 03362 (Hausärztlich geriatrischer Betreuungskomplex),</li> <li>- EBM-GOP 30980 (Abklärung vor Durchführung eines weiterführenden geriatrischen Assessments durch Hausarzt),</li> <li>- EBM-GOP 30981 (Abklärung vor Durchführung eines weiterführenden geriatrischen Assessments durch spez. Geriatrischen Vertragsarzt),</li> <li>- EBM-GOP 30984 (Weiterführendes geriatrisches Assessment),</li> <li>- EBM-GOP 30985 (Zuschlag zur GOP 30984),</li> <li>- EBM-GOP 30986 (Zuschlag zur GOP 30985),</li> <li>- EBM-GOP 30988 (Zuschlag [...] für die Einleitung und Koordination von Therapiemaßnahmen nach Durchführung eines weiterführenden geriatrischen Assessments)</li> <li>- sowie in Westfalen-Lippe zusätzlich über EBM-GOP 30980D und EBM-GOP 30981D.</li> </ul> <p>Eine Abrechnung von AAPV-Leistungen bei den selben Versicherten wurde ausgeschlossen.</p>                                              |
| Geriatrische oder AAPV-Leistung | Abrechnung mindestens einer der oben aufgeführten geriatrischen Leistungen oder von AAPV-Leistungen (s.o. AAPV).                                                                                                                                                                                                                                                                                                                                                                                                                                                                                                                                                                                                                                                                                                                                                                                                                                                        |
| <b>SAPV</b>                     |                                                                                                                                                                                                                                                                                                                                                                                                                                                                                                                                                                                                                                                                                                                                                                                                                                                                                                                                                                         |
| SAPV-VO                         | Inanspruchnahme von SAPV auf der Basis von SAPV-Verordnungen: <ul style="list-style-type: none"> <li>- EBM-GOP 01424 (Erstverordnung),</li> <li>- EBM-GOP 01426 (Folgeverordnung).</li> </ul>                                                                                                                                                                                                                                                                                                                                                                                                                                                                                                                                                                                                                                                                                                                                                                           |
| SAPV-VO aus Krankenhaus         | Inanspruchnahme von SAPV, deren Erstverordnung aus dem Krankenhaus erfolgte/vom Krankenhausarzt ausgestellt wurde. Diese sind nicht in GKV (Gesetzliche Krankenversicherung)-Routinedaten abgebildet. Wir haben sie indirekt identifiziert, anhand einer erstmaligen SAPV-Leistungsabrechnung (siehe SAPV) in enger zeitlicher Verbindung (bis 7 Tage) mit der Entlassung aus dem Krankenhaus bei gleichzeitigem Fehlen einer SAPV-Erstverordnung. VS aus Westfalen-Lippe haben wir von dieser Analyse ausgeschlossen, da hier eine SAPV-Verordnung nach Muster 63 nicht nötig ist, um die spezialisierte ambulante PV zu initiieren.                                                                                                                                                                                                                                                                                                                                   |
| SAPV ohne AAPV und ohne BQKPmV  | Inanspruchnahme von SAPV ohne vor-, parallel, nachgelagerte AAPV und ohne vor-/nachgelagerte BQKPmV.                                                                                                                                                                                                                                                                                                                                                                                                                                                                                                                                                                                                                                                                                                                                                                                                                                                                    |
| <b>Pflegerische Versorgung</b>  |                                                                                                                                                                                                                                                                                                                                                                                                                                                                                                                                                                                                                                                                                                                                                                                                                                                                                                                                                                         |
| HKPpall                         | Inanspruchnahme palliativer HKP-Leistungen gemäß Nr. 24a der HKP-Richtlinie. Die Identifizierung erfolgte in den HKP-Leistungstabellen anhand des bundeseinheitlichen Positionsnummernverzeichnisses für HKP [8] über die Stellen 4-6. Erfasst wurden die folgenden Leistungen: <ul style="list-style-type: none"> <li>- 321 (Palliative Behandlungspflege),</li> <li>- 808 (Tagespauschale "Ambulante Palliativpflege"),</li> <li>- B24 (Symptomkontrolle bei Palliativpatientinnen und Palliativpatienten - Leistungsbeginn-Pauschale),</li> <li>- B25 (Symptomkontrolle bei Palliativpatientinnen und Palliativpatienten - Tagespauschale 1 – Erstverordnung),</li> <li>- B26 (Symptomkontrolle bei Palliativpatientinnen und Palliativpatienten - Tagespauschale 2 – Folgeverordnung),</li> <li>- B27 (Symptomkontrolle bei Palliativpatientinnen und Palliativpatienten – Finalpauschale),</li> <li>- A89 (Symptomkontrolle als Komplexleistung (24a)),</li> </ul> |

| Kennzahl                        | Erläuterung                                                                                                                                                                                                                                                                                                                                                                                                                                                                                                                                                       |
|---------------------------------|-------------------------------------------------------------------------------------------------------------------------------------------------------------------------------------------------------------------------------------------------------------------------------------------------------------------------------------------------------------------------------------------------------------------------------------------------------------------------------------------------------------------------------------------------------------------|
|                                 | <ul style="list-style-type: none"> <li>- B23 (Symptomkontrolle als Tagespauschale (24a)),</li> <li>- B89 (Einsatzpauschale AAPV - Allgemeine ambulante Palliativversorgung (Nr. 24a)),</li> <li>- A86 (Kontinuierliche Medikamentengabe über Schmerzpumpe im Rahmen der Symptomkontrolle (24a)),</li> <li>- A87 (Wundversorgung als Einzelfallentscheidung im Rahmen der Symptomkontrolle (24a)).</li> </ul>                                                                                                                                                      |
| HKP ab ambulanter PV            | Inanspruchnahme von HKP-Leistungen ab der ersten ambulanten Palliativleistung (AAPV, BQKPmV, SAPV).                                                                                                                                                                                                                                                                                                                                                                                                                                                               |
| ambulante Pflege                | Inanspruchnahme mindestens einer der folgenden ambulanten Pflegeleistungen: <ul style="list-style-type: none"> <li>- Pflegesachleistungen (gem. §36 SGB XI)</li> <li>- Pflegegeld (gem. §37 SGB XI)</li> <li>- Verhinderungspflege (gem. §39 SGB XI)</li> </ul>                                                                                                                                                                                                                                                                                                   |
| <b>sonstige</b>                 |                                                                                                                                                                                                                                                                                                                                                                                                                                                                                                                                                                   |
| Ambulante PV                    | Inanspruchnahme von AAPV oder BQKPmV oder SAPV. Weitere Versorgungsformen blieben unberücksichtigt.                                                                                                                                                                                                                                                                                                                                                                                                                                                               |
| Stationäre PV ohne ambulante PV | Inanspruchnahme von stationärer PV, ohne dass zuvor oder nachher ambulante PV (AAPV, BQKPmV, SAPV) zum Einsatz kam.                                                                                                                                                                                                                                                                                                                                                                                                                                               |
| Tageshospiz                     | Die Inanspruchnahme von Tageshospizen identifizierten wir in der entsprechenden Leistungstabelle über: <ul style="list-style-type: none"> <li>- den „Zuschuss teilstationäre Hospizbehandlung“ bzw.</li> <li>- den „Zuschuss ambulante Hospizbehandlung“.</li> </ul> Die unter <a href="https://kh-entgeltschluessel.gkv-datenaustausch.de/">https://kh-entgeltschluessel.gkv-datenaustausch.de/</a> recherchierten Entgelte für Leistungen palliativmedizinischer Tageskliniken konnten wir bisher in den entsprechenden Leistungstabellen nicht identifizieren. |

## A.5 Datenaufbereitung

Die Daten der Studienpopulation haben wir im wissenschaftlichen Datawarehouse der BARMER mittels SAS Enterprise Guide Version 8.3 (SAS 9.4, SAS Institute Inc./Cary/NC/USA) aufbereitet. Die Aufbereitung der zugespielten Regionsmerkmale sowie die im Folgenden erläuterte Berechnung des Charlson-Komorbiditätsindex und der Standardisierungsfaktoren erfolgte in R, Version 4.1.2.

Den Charlson-Komorbiditätsindex (Charlson Comorbidity Index, CCI [9]) berechneten wir mit dem R Package *comorbidity* [10], Version 0.5.3 als gewichteten CCI, nicht als einfache Summe. Grundlage für die Berechnung waren gesicherte Diagnosen aus den Versorgungsbereichen der ambulanten ärztlichen und Krankenhausleistungen sowie alle Haupt- und Nebendiagnosen aus dem Bereich Krankenhaus, jeweils im letzten Lebensjahr. Der CCI ging als metrische Größe in die Analyse ein.

Um eine Alters- und Geschlechtsstandardisierung zu realisieren, berechneten wir je Bundesland und Jahr Standardisierungsfaktoren, die in den Analysen (vgl. nächster Abschnitt) als Gewichte herangezogen wurden. Hierzu berechneten wir ausgehend von den Sterbefallstatistiken der Gesundheitsberichterstattung des Bundes für die Jahre 2016 bis 2019, wie groß der Anteil jeder soziodemografischen Subgruppe (nach Geschlecht und 5-Jahres-Altersgruppe) an allen Sterbefällen des jeweiligen Bundeslands pro Jahr ausfiel. In einem zweiten Schritt berechneten wir dieselben Anteile für die Studienpopulation. Der Quotient des jeweiligen Anteils in der Studienpopulation durch den jeweiligen Anteil in der Allgemeinbevölkerung ergibt das (noch nicht normalisierte)

Gewicht für Verstorbene aus der jeweiligen Subgruppe<sup>3</sup>. Im letzten Schritt wurden die Gewichte auf Ebene der KV pro Jahr normalisiert (durch Multiplikation mit dem Quotienten aus unstandardisiertem und standardisiertem N je KV und Jahr).

## A.6 Statistische Analysen

Alle Analysen führten wir mit R, Version 4.1.2, durch. Analysen, die sich auf die Studienpopulation beziehen, beruhen stets auf alters- und geschlechtsstandardisierten Daten. Die berechneten Standardisierungsfaktoren bezogen wir hierfür in allen Analysen als Gewichte ein und nutzten dafür Funktionen aus dem R Package *survey* [11].

### Deskriptive Analyse

Für die deskriptive Analyse der Patientenmerkmale und der Inanspruchnahme berechneten wir je nach Skalenniveau der Variablen den Anteil in % bzw. Mittelwert und Standardabweichung.

Bei der Analyse der Wohnkreismerkmale sind die Beobachtungseinheiten keine Verstorbenen, sondern Kreise. Für die beiden Kenngrößen weisen wir den kreisbevölkerungsgewichteten Mittelwert der Kreise aus. Ihre Zuordnung zu den Verstorbenen erfolgte nach deren Wohnkreis.

### Mittlerer Zeittrend und regionale Abweichung vom mittleren Zeittrend

Zur Überprüfung des mittleren Zeittrends in der Inanspruchnahme der einzelnen Versorgungsformen (PV, AAPV, SAPV, stationäre PV und Hospiz) rechneten wir jeweils ein multiples Regressionsmodell (binär logistische Regression), mit der jeweiligen Zielgröße (z.B. Inanspruchnahme AAPV: ja/nein) als Outcome und den Prädiktoren KV, Jahr und der Interaktion KV\*Jahr. Hierbei ging Jahr als ordinale Variable ein und KV als 17-stufige, kategoriale Variable mit Effect Coding (ungewichtetes sum coding). Bedingt durch diese Kodierung kann man am Regressionskoeffizient des Prädiktors „Jahr“ den mittleren zeitlichen Trend ablesen, also die Veränderung der jeweiligen Inanspruchnahmerate über die Zeit, gemittelt über alle 17 KVen. Die einzelnen Kontraste des Interaktionsterms erlauben eine Prüfung des Unterschieds des zeitlichen Trends jeder einzelnen KV von diesem mittleren zeitlichen Trend. Für diejenigen KVen, die eine signifikante Abweichung vom mittleren Trend zeigten, schlossen wir eine Simple Slope Analyse an. Simple Slope Analysen dienen dem tieferen Verständnis der Ergebnisse von Regressionsanalysen mit Interaktionsterm. Sie beinhalten die Berechnung des „Slopes“, d.h. des Anstiegs/Abfalls der Regressionsgerade (hier: die mit den Jahren ansteigende/abfallende Inanspruchnahme) für bestimmte Werte der moderierenden Variable (hier: bestimmte KVen). Mithilfe dieser einzelnen Simple Slopes können wir Aussagen über die (in der jeweiligen KV eben signifikant vom mittleren Trend abweichende) zeitliche Entwicklung der Inanspruchnahme treffen.

### Variabilität

Wir untersuchten für alle Hauptversorgungsformen (PV, AAPV, BQKPmV, SAPV, stat. PV und Hospiz) die Variabilität der Inanspruchnahmeraten zwischen den KVen, und zwar jeweils im Jahr 2019 und 2016. Hierfür bestimmten wir zunächst den Mittelwert und die Standardabweichung der 17 KV-spezifischen Inanspruchnahmeraten je Versorgungsform und Jahr. Anschließend berechneten wir die

---

<sup>3</sup> Da Sterbefallstatistiken lediglich je Bundesland veröffentlicht werden, nicht je KV, waren diese noch nicht normalisierten Gewichte für die KVen Nordrhein und Westfalen-Lippe identisch.

Variationskoeffizienten (VK), jeweils als Quotient aus Standardabweichung geteilt durch Mittelwert<sup>4</sup>. Der VK ist ein relatives Streuungsmaß und erlaubt so auch einen Vergleich der Variabilität von Inanspruchnahmeraten, die sich in ihrem Mittelwert deutlich unterscheiden. So bedeutet ein Variationskoeffizient von 0,25 (25%), dass die mittlere Abweichung der 17 KV-spezifischen Inanspruchnahmeraten vom Mittelwert aller KVen genau 25%, also ein Viertel des Mittelwerts beträgt.

Tab. 2 (im Hauptmanuskript) zeigt die ermittelten VK in Prozent für das Jahr 2019, sowie die Differenz zu 2016. Ergänzend dargestellt werden die in die Berechnung des VK eingeflossenen Mittelwerte der KVen sowie, als Ergänzung, das Minimum und Maximum je KV, und der Mittelwert über alle bundesweit Verstorbenen im Jahr 2019.

### **Adjustierung der Inanspruchnahmeraten, des mittleren Zeittrends und der regionalen Abweichung vom mittleren Zeittrend um versorgungsbedarfsbezogene Patienten- und versorgungszugangsbezogene Wohnkreismerkmale**

Wir adjustierten die Inanspruchnahmeraten im Jahr 2019 um versorgungsbedarfsbezogene Patientenmerkmale sowie versorgungszugangsbezogene Wohnkreismerkmale. Auf diese Weise überprüften wir die Hypothese, die Variation der PV-Inanspruchnahmeraten zwischen den KVen sei größtenteils durch unterschiedlich verteilte Versorgungsbedarfe begründet, auf ihre empirische Evidenz. Wir adjustierten auch die mittleren Zeittrends der Inanspruchnahmeraten und die regionalen Abweichungen vom mittleren Zeittrend.

Die verwendeten Adjustierungsgrößen umfassten in GKV (Gesetzliche Krankenversicherung)-Routinedaten verfügbare soziodemografische Merkmale und Patientencharakteristika aus dem letzten Lebensjahr sowie Merkmale des Wohnorts, von denen Einfluss auf Indikation und Umfang palliativen Versorgungsbedarfs sowie Zugang zu palliativem Versorgungsangebot ausgehen kann. Wir stellten literaturbasiert [12–14] bzw. durch Expertenmeinung gestützt folgende Liste an Adjustierungsgrößen zusammen: Alter (metrisch), Geschlecht (binär), Pflegebedarf (gemessen als dreistufige kategoriale Variable: Leben in der Häuslichkeit ohne Pflegegrad, Leben in der Häuslichkeit mit Pflegegrad bzw. Leben im Pflegeheim (Zeitpunkt: Beginn des letzten Lebensjahres; Pflegegrad: letzter dokumentierter Pflegegrad)), die aggregierte Morbidität (gemessen als gewichteter Charlson Komorbiditätsindex, CCI) das Vorhandensein (dichotom) einer Krebs- und/oder einer anderen potenziell palliativversorgungsrelevanten chronischen Grunderkrankung (Tabelle A-4), sowie als Merkmale des Versorgungszugangs der sozioökonomische Deprivationsgrad (GISD) und der Anteil ländlich lebender Einwohner des Wohnkreises des Verstorbenen (beide metrisch).

**Tabelle A-4: Potenziell palliativversorgungsrelevante chronische Grunderkrankungen<sup>#</sup>**

| <b>Grunderkrankung</b>      | <b>ICD-10-GM Codes</b>                |
|-----------------------------|---------------------------------------|
| Tumorerkrankung             | C00*-C97*                             |
| Herz-Kreislauf-Erkrankung   | I0*-I6*                               |
| Herzinsuffizienz            | I50*                                  |
| Zerebrovaskuläre Erkrankung | I60*-I69*                             |
| Nierenerkrankung            | N17*-N18*, N28*, I12*-I13*            |
| Lebererkrankung             | K70*-K77*                             |
| Atemwegserkrankung          | J09*-J18*, J20*-J22*, J40*-J47*, J96* |

<sup>4</sup> Dies impliziert, dass ein- und dieselbe Standardabweichung bei einem höheren Mittelwert einen geringeren VK ergibt. In anderen Worten: Bei einem höheren Mittelwert der KVen, also einer höheren Inanspruchnahmerate, braucht es auch eine höhere Standardabweichung, um einen VK ähnlicher Größenordnung zu erzeugen.

| Grunderkrankung              | ICD-10-GM Codes                     |
|------------------------------|-------------------------------------|
| Neurodegenerative Erkrankung | G10*, G20*, G35*, G122*, G231-G233* |
| Demenz, Alzheimer, Senilität | F00*-F03*, G30*, R54*               |
| HIV, AIDS                    | B20*-B24*                           |

*#identifiziert anhand einer mindestens einmalig kodierten Diagnose (gesichert ambulant, Krankenhaus-Haupt- oder -Nebendiagnose) im letzten Lebensjahr; die unterschiedenen Krankheitsentitäten orientierten sich an Murtagh et al. 2014 [15].*

Nicht erfassbar über die uns zur Verfügung stehenden Daten sind andere relevante Prädiktoren für die Inanspruchnahme von PV wie bspw. Symptomlast und Angehörigenunterstützung.

Auch überprüften wir den Zusammenhang zwischen den ausgewählten versorgungsbedarfsbezogenen Patienten- und versorgungszugangsbezogenen Wohnkreismerkmalen mit der Inanspruchnahme von PV (Tabelle B-10).

Zu Illustrationszwecken berechneten wir basierend auf der soeben geschilderten Liste der Adjustierungsgrößen adjustierte Inanspruchnahmeraten für das Jahr 2019. Ausgegeben wurden die *Marginal Predictive Means*, also die Inanspruchnahmeraten, die sich rechnerisch ergeben, wenn in allen KVen die gleiche (nämlich die über die gesamte Studienpopulation des Jahres 2019 hinweg beobachtete) Verteilung der Patienten- und Wohnkreismerkmale angenommen wird. Diese Methode der Berechnung (*marginal standardization*) ist in diesem Fall anderen Methoden der Bestimmung adjustierter Werte vorzuziehen [16]. Für die Berechnung nutzten wir die Funktion *svypredmeans* aus dem R Package *survey* [11].

Um den mittleren Zeittrend und die regionale Abweichung vom mittleren Zeittrend für den Einfluss von Patienten- und Wohnortcharakteristika zu kontrollieren, wurden die Adjustierungsgrößen als zusätzliche Prädiktoren in das im Abschnitt „Mittlerer Zeittrend und regionale Abweichung vom mittleren Zeittrend“ (siehe Seite 13) geschilderte multiple Regressionsmodell aufgenommen. Bei zwei der Adjustierungsgrößen kann dabei davon ausgegangen werden, dass sich der Zusammenhang mit der Inanspruchnahme über die Jahre verändert hat: Krebserkrankung und Pflegebedarf. Um dafür ebenfalls zu kontrollieren, wurde für diese, und nur für diese, nicht nur der (dann mit gewichteter Effektkodierung versehene) Haupteffekt, sondern auch die Interaktion mit Jahr als Prädiktor aufgenommen. Es wurde geprüft, ob sich die statistischen Schlussfolgerungen hinsichtlich der (regionalen Abweichung von den) mittleren Zeittrends durch Kontrolle der genannten Variablen ändern.

## A.7 Unterschiede zur Publikation Ditscheid et al. 2020

Im Gegensatz zu Ditscheid et al. 2020 [17] (Ergebnisse aus SAVOIR – Teilprojekt 5) haben wir für die Datenanalyse im Projekt *pallCompare* eine mind. einjährige (in SAVOIR: zweijährige), durchgängige Versicherung bei der datenbereitstellenden Krankenkasse als Einschlusskriterium definiert und die Inanspruchnahme im gesamten letzten Lebensjahr (letzte 12 Lebensmonate) betrachtet (in SAVOIR: letzte 6 Lebensmonate). Im Bereich der ambulanten PV standen uns nun auch die SAPV-Leistungsabrechnungen aus Berlin zur Verfügung. Im Bereich der stationären PV berücksichtigten wir palliative Leistungen zusätzlich über die Abrechnungen als „Besondere Einrichtungen“.

Wir haben eine andere Methode der Standardisierung angewandt: So berechneten wir die Standardisierungsfaktoren in SAVOIR für eine bundesweite Zielpopulation, während die Zielpopulation in *pallCompare* in den KVen liegt. Entsprechend bestimmten wir die

Standardisierungsfaktoren in *pallCompare* je Bundesland und normalisierten sie auf KV-Ebene (siehe auch A.5). Mit diesem Vorgehen tragen wir der Tatsache Rechnung, dass die Abweichung der demografischen Struktur der verstorbenen BARMER-Versicherten von der demografischen Struktur der Allgemeinbevölkerung von Region zu Region unterschiedlich ausfallen kann [18].



## B. eERGEBNISSE: Ergänzungen zu den Ergebnissen

**Tabelle B-1: Studienpopulation je Jahr und KV: Verstorbene BARMER-Versicherte (n) und deren Anteil (%) innerhalb der Studienpopulation**

|                                    | Jahr                   |                        |                         |                         |                         |
|------------------------------------|------------------------|------------------------|-------------------------|-------------------------|-------------------------|
|                                    | 2016                   | 2017                   | 2018                    | 2019                    | Alle Jahre              |
| <b>Kassenärztliche Vereinigung</b> |                        |                        |                         |                         |                         |
| Baden-Württemberg                  | 8.105 (8,3%)           | 8.508 (8,5%)           | 8.738 (8,5%)            | 9.533 (8,1%)            | 34.884 (8,4%)           |
| Bayern                             | 12.035 (12,4%)         | 12.182 (12,2%)         | 12.462 (12,1%)          | 15.413 (13,1%)          | 52.092 (12,5%)          |
| Berlin                             | 4.444 (4,6%)           | 4.586 (4,6%)           | 4.900 (4,8%)            | 5.753 (4,9%)            | 19.683 (4,7%)           |
| Brandenburg                        | 3.518 (3,6%)           | 3.812 (3,8%)           | 3.890 (3,8%)            | 4.481 (3,8%)            | 15.701 (3,8%)           |
| Bremen                             | 428 (0,4%)             | 500 (0,5%)             | 480 (0,5%)              | 547 (0,5%)              | 1.955 (0,5%)            |
| Hamburg                            | 2.077 (2,1%)           | 2.093 (2,1%)           | 2.241 (2,2%)            | 2.267 (1,9%)            | 8.678 (2,1%)            |
| Hessen                             | 8.426 (8,7%)           | 8.704 (8,7%)           | 8.639 (8,4%)            | 9.906 (8,4%)            | 35.675 (8,5%)           |
| Mecklenburg-Vorpommern             | 2.194 (2,3%)           | 2.230 (2,2%)           | 2.411 (2,3%)            | 2.935 (2,5%)            | 9.770 (2,3%)            |
| Niedersachsen                      | 8.923 (9,2%)           | 8.946 (9,0%)           | 9.365 (9,1%)            | 12.608 (10,7%)          | 39.842 (9,5%)           |
| Nordrhein                          | 15.297 (15,7%)         | 15.281 (15,3%)         | 15.866 (15,4%)          | 17.017 (14,5%)          | 63.461 (15,2%)          |
| Rheinland-Pfalz                    | 5.117 (5,3%)           | 5.300 (5,3%)           | 5.377 (5,2%)            | 5.801 (4,9%)            | 21.595 (5,2%)           |
| Saarland                           | 1.250 (1,3%)           | 1.273 (1,3%)           | 1.290 (1,3%)            | 1.406 (1,2%)            | 5.219 (1,3%)            |
| Sachsen                            | 4.495 (4,6%)           | 4.871 (4,9%)           | 4.989 (4,8%)            | 5.830 (5,0%)            | 20.185 (4,8%)           |
| Sachsen-Anhalt                     | 2.810 (2,9%)           | 2.860 (2,9%)           | 3.109 (3,0%)            | 3.441 (2,9%)            | 12.220 (2,9%)           |
| Schleswig-Holstein                 | 4.536 (4,7%)           | 4.657 (4,7%)           | 4.793 (4,6%)            | 5.067 (4,3%)            | 19.053 (4,6%)           |
| Thüringen                          | 2.470 (2,5%)           | 2.636 (2,6%)           | 2.768 (2,7%)            | 3.224 (2,7%)            | 11.098 (2,7%)           |
| Westfalen-Lippe                    | 11.135 (11,4%)         | 11.146 (11,2%)         | 11.806 (11,4%)          | 12.207 (10,4%)          | 46.294 (11,1%)          |
| <b>Deutschland</b>                 | <b>97.260 (100,0%)</b> | <b>99.585 (100,0%)</b> | <b>103.124 (100,0%)</b> | <b>117.436 (100,0%)</b> | <b>417.405 (100,0%)</b> |

Anmerkung: Aufgrund unserer Art der Standardisierung sind die unstandardisierten n je KV & Jahr exakt gleich den standardisierten n je KV & Jahr. KV: Kassenärztliche Vereinigung

**Tabelle B-2: Patientenmerkmale, aggregiert über Jahre und KVen (alters- und geschlechtsstandardisiert)**

|                                     | N = 417.405     |
|-------------------------------------|-----------------|
| Geschlecht (Anteil weiblich), n (%) | 211.851 (50,8%) |
| Alter (metrisch), MW (S)            | 78,64 (12,8)    |
| CCI, gewichtet, MW (S)              | 6,43 (4,1)      |
| Tumor, n (%)                        | 173.131 (41,5%) |
| Herz-Kreislauf-Erkrankung, n (%)    | 378.431 (90,7%) |
| Herzinsuffizienz, n (%)             | 188.013 (45,0%) |
| Zerebrovaskuläre Erkrankung, n (%)  | 143.913 (34,5%) |
| Nierenerkrankung, n (%)             | 209.451 (50,2%) |
| Lebererkrankung, n (%)              | 84.635 (20,3%)  |
| Atemwegserkrankung, n (%)           | 256.008 (61,3%) |
| Neurodegenerative Erkrankung, n (%) | 30.944 (7,4%)   |
| Demenz, Alzheimer, Senilität, n (%) | 186.375 (44,7%) |
| HIV, AIDS, n (%)                    | 620 (0,1%)      |
| Pflegebedürftigkeit, n (%)          |                 |
| Häuslichkeit ohne Pflegegrad        | 117.503 (28,2%) |
| Häuslichkeit mit Pflegegrad         | 226.115 (54,2%) |
| Pfleheim                            | 73.787 (17,7%)  |

CCI: Charlson Comorbidity Index, KV: Kassenärztliche Vereinigung, MW: Mittelwert, S: Standardabweichung

**Tabelle B-3: Studienpopulation vs. alle Sterbefälle je Bundesland im gesamten Zeitraum 2016-2019**

| Bundesland             | Studienpopulation |              | Verstorbene im BL laut gbe-Bund |              | Differenz |         |
|------------------------|-------------------|--------------|---------------------------------|--------------|-----------|---------|
|                        | Anzahl            | %            | Anzahl                          | %            | absolut   | relativ |
| Baden-Württemberg      | 34.884            | 8,4          | 436.064                         | 11,7         | -3,4      | -28,7   |
| Bayern                 | 52.092            | 12,5         | 529.838                         | 14,2         | -1,8      | -12,4   |
| Berlin                 | 19.683            | 4,7          | 138.216                         | 3,7          | 1,0       | 26,9    |
| Brandenburg            | 15.701            | 3,8          | 126.827                         | 3,4          | 0,4       | 10,3    |
| Bremen                 | 1.955             | 0,5          | 31.210                          | 0,8          | -0,4      | -44,2   |
| Hamburg                | 8.678             | 2,1          | 70.123                          | 1,9          | 0,2       | 10,3    |
| Hessen                 | 35.675            | 8,5          | 262.968                         | 7,1          | 1,5       | 20,9    |
| Mecklenburg-Vorpommern | 9.770             | 2,3          | 84.538                          | 2,3          | 0,1       | 3,0     |
| Niedersachsen          | 39.842            | 9,5          | 374.478                         | 10,1         | -0,5      | -5,2    |
| Nordrhein-Westfalen    | 109.755           | 26,3         | 820.302                         | 22,1         | 4,2       | 19,2    |
| Rheinland-Pfalz        | 21.595            | 5,2          | 188.248                         | 5,1          | 0,1       | 2,2     |
| Saarland               | 5.219             | 1,3          | 53.399                          | 1,4          | -0,2      | -12,9   |
| Sachsen                | 20.185            | 4,8          | 218.590                         | 5,9          | -1,0      | -17,7   |
| Sachsen-Anhalt         | 12.220            | 2,9          | 129.606                         | 3,5          | -0,6      | -16,0   |
| Schleswig-Holstein     | 19.053            | 4,6          | 138.583                         | 3,7          | 0,8       | 22,5    |
| Thüringen              | 11.098            | 2,7          | 116.313                         | 3,1          | -0,5      | -15,0   |
| <b>Deutschland</b>     | <b>417.405</b>    | <b>100,0</b> | <b>3.719.303</b>                | <b>100,0</b> |           |         |

BL: Bundesland, gbe-Bund: Gesundheitsberichterstattung des Bundes

**Tabelle B-4: Patientenmerkmale (außer Grunderkrankungen) je KV, über alle Jahre hinweg (alters- und geschlechtsstandardisiert)**

| KV                     | Geschlecht<br>(weiblich) |      | Alter           |      | CCI (gewichtet) |      | Pflegebedarf                    |      |                                |      |          |      |
|------------------------|--------------------------|------|-----------------|------|-----------------|------|---------------------------------|------|--------------------------------|------|----------|------|
|                        |                          |      |                 |      |                 |      | Häuslichkeit ohne<br>Pflegegrad |      | Häuslichkeit mit<br>Pflegegrad |      | Pfleheim |      |
|                        | %                        | Rang | MW(S)           | Rang | MW(S)           | Rang | %                               | Rang | %                              | Rang | %        | Rang |
| Baden-Württemberg      | 50,7                     | 8    | 79,32<br>(12,9) | 1    | 6,17<br>(4,0)   | 13   | 26,9                            | 14   | 54,5                           | 10   | 18,7     | 4    |
| Bayern                 | 51,0                     | 4    | 79,16<br>(12,9) | 3    | 6,54<br>(4,1)   | 8    | 31,4                            | 2    | 50,6                           | 16   | 18,0     | 5    |
| Berlin                 | 50,4                     | 12   | 77,32<br>(13,2) | 16   | 6,86<br>(4,2)   | 3    | 31,5                            | 1    | 52,9                           | 14   | 15,6     | 14   |
| Brandenburg            | 49,4                     | 16   | 77,92<br>(12,6) | 14   | 6,99<br>(4,2)   | 2    | 27,7                            | 9    | 56,8                           | 3    | 15,4     | 15   |
| Bremen                 | 50,6                     | 9    | 78,18<br>(12,9) | 12   | 5,70<br>(4,0)   | 17   | 26,9                            | 13   | 57,3                           | 2    | 15,8     | 13   |
| Hamburg                | 51,2                     | 3    | 78,34<br>(13,2) | 11   | 6,04<br>(4,0)   | 15   | 30,2                            | 4    | 50,7                           | 15   | 19,1     | 3    |
| Hessen                 | 50,8                     | 7    | 78,98<br>(12,9) | 4    | 6,09<br>(4,0)   | 14   | 27,3                            | 11   | 55,3                           | 7    | 17,3     | 9    |
| Mecklenburg-Vorpommern | 48,8                     | 17   | 77,29<br>(12,7) | 17   | 6,82<br>(4,1)   | 5    | 26,2                            | 16   | 58,8                           | 1    | 15,0     | 17   |
| Niedersachsen          | 50,6                     | 10   | 78,67<br>(12,9) | 7    | 6,36<br>(4,1)   | 11   | 25,3                            | 17   | 54,3                           | 11   | 20,4     | 1    |
| Nordrhein              | 51,8                     | 1    | 78,87<br>(12,6) | 6    | 6,32<br>(4,0)   | 12   | 26,4                            | 15   | 56,1                           | 5    | 17,5     | 7    |
| Rheinland-Pfalz        | 50,9                     | 5    | 78,91<br>(12,7) | 5    | 6,42<br>(4,1)   | 10   | 28,1                            | 8    | 54,3                           | 12   | 17,6     | 6    |
| Saarland               | 51,3                     | 2    | 78,39<br>(12,5) | 9    | 6,58<br>(4,0)   | 7    | 28,6                            | 7    | 56,3                           | 4    | 15,1     | 16   |
| Sachsen                | 50,8                     | 6    | 79,21<br>(12,4) | 2    | 6,64<br>(4,0)   | 6    | 27,7                            | 10   | 54,9                           | 8    | 17,4     | 8    |
| Sachsen-Anhalt         | 49,9                     | 15   | 77,85<br>(12,5) | 15   | 6,83<br>(4,1)   | 4    | 28,7                            | 6    | 54,7                           | 9    | 16,6     | 12   |
| Schleswig-Holstein     | 50,4                     | 13   | 78,51<br>(12,8) | 8    | 5,99<br>(4,0)   | 16   | 30,3                            | 3    | 50,2                           | 17   | 19,6     | 2    |

Onlinematerial zum Beitrag: „Inanspruchnahme von Palliativversorgung am Lebensende in Deutschland: zeitlicher Verlauf (2016-2019) und regionale Variabilität“

| KV                 | Geschlecht (weiblich) |      | Alter                   |      | CCI (gewichtet)       |      | Pflegebedarf                 |      |                             |      |             |      |
|--------------------|-----------------------|------|-------------------------|------|-----------------------|------|------------------------------|------|-----------------------------|------|-------------|------|
|                    |                       |      |                         |      |                       |      | Häuslichkeit ohne Pflegegrad |      | Häuslichkeit mit Pflegegrad |      | Pfleheim    |      |
|                    | %                     | Rang | MW(S)                   | Rang | MW(S)                 | Rang | %                            | Rang | %                           | Rang | %           | Rang |
| Thüringen          | 50,5                  | 11   | 78,38<br>(12,4)         | 10   | 7,01<br>(4,1)         | 1    | 26,9                         | 12   | 55,9                        | 6    | 17,2        | 10   |
| Westfalen-Lippe    | 50,3                  | 14   | 78,12<br>(13,1)         | 13   | 6,49<br>(4,1)         | 9    | 29,3                         | 5    | 53,9                        | 13   | 16,8        | 11   |
| <b>Deutschland</b> | <b>50,8</b>           | -    | <b>78,64<br/>(12,8)</b> | -    | <b>6,43<br/>(4,1)</b> | -    | <b>28,2</b>                  | -    | <b>54,2</b>                 | -    | <b>17,7</b> | -    |

CCI: Charlson Comorbidity Index, KV: Kassenärztliche Vereinigung, MW: Mittelwert, S: Standardabweichung

Das mittlere Alter der in den Jahren 2016-2019 insgesamt Verstorbenen schwankte zwischen 77,3 Jahren in Mecklenburg-Vorpommern bis 79,3 Jahren in Baden-Württemberg. Der Anteil verstorbener Frauen war am niedrigsten in Mecklenburg-Vorpommern mit 48,8% und am höchsten in Nordrhein mit 51,8%. Der CCI schwankte zwischen 5,7 in Bremen und 7,0 in Thüringen. Der Anteil von VS, die vor ihrem Tod ohne Pflegegrad in der Häuslichkeit lebten, reichte von 25,3% in Niedersachsen bis 31,5% in Berlin. Und der Anteil von VS, die vor ihrem Tod mit Pflegegrad in der Häuslichkeit lebten, reichte von 50,3% in Schleswig-Holstein bis 58,8% in Mecklenburg-Vorpommern. Der Anteil an VS, die ein Jahr vor ihrem Tod im Pflegeheim lebten, betrug zwischen 15,0% in Mecklenburg-Vorpommern und 20,4% in Niedersachsen.

**Tabelle B-5: Patientenmerkmale (nur Grunderkrankungen) je KV, über alle Jahre hinweg (alters- und geschlechtsstandardisiert)**

| KV                     | Tumor       |          | Herz-Kreislauf-Erkrankung |          | Herzinsuffizienz |          | Zerebrovaskuläre Erkrankung |          | Nierenerkrankung |          | Lebererkrankung |          | Atemwegserkrankung |          | Neurodegenerative Erkrankung |          | Demenz, Alzheimer, Senilität |          | HIV, AIDS  |          |
|------------------------|-------------|----------|---------------------------|----------|------------------|----------|-----------------------------|----------|------------------|----------|-----------------|----------|--------------------|----------|------------------------------|----------|------------------------------|----------|------------|----------|
|                        | %           | Rang     | %                         | Rang     | %                | Rang     | %                           | Rang     | %                | Rang     | %               | Rang     | %                  | Rang     | %                            | Rang     | %                            | Rang     | %          | Rang     |
| Baden-Württemberg      | 40,7        | 13       | 89,6                      | 13       | 43,4             | 12       | 33,9                        | 12       | 48,0             | 12       | 20,1            | 10       | 59,8               | 13       | 7,1                          | 11       | 49,6                         | 2        | 0,1        | 11       |
| Bayern                 | 41,1        | 10       | 90,2                      | 12       | 46,7             | 7        | 35,0                        | 8        | 53,2             | 5        | 23,3            | 1        | 60,8               | 8        | 7,3                          | 8        | 44,2                         | 7        | 0,1        | 8        |
| Berlin                 | 43,1        | 3        | 89,5                      | 14       | 44,4             | 9        | 31,5                        | 14       | 55,5             | 3        | 22,0            | 3        | 62,7               | 6        | 6,9                          | 15       | 43,2                         | 10       | 0,5        | 1        |
| Brandenburg            | 43,3        | 2        | 92,4                      | 4        | 43,9             | 10       | 34,1                        | 11       | 60,5             | 1        | 20,2            | 9        | 61,0               | 7        | 7,1                          | 9        | 42,6                         | 12       | 0,1        | 15       |
| Bremen                 | 39,1        | 17       | 87,6                      | 17       | 37,7             | 17       | 30,8                        | 17       | 40,4             | 17       | 19,8            | 11       | 58,2               | 16       | 6,1                          | 17       | 39,3                         | 17       | 0,2        | 4        |
| Hamburg                | 42,0        | 6        | 87,6                      | 16       | 40,4             | 16       | 33,5                        | 13       | 44,8             | 16       | 16,4            | 17       | 60,2               | 11       | 6,9                          | 14       | 48,6                         | 3        | 0,3        | 2        |
| Hessen                 | 40,4        | 16       | 90,4                      | 10       | 42,9             | 13       | 31,5                        | 15       | 45,9             | 14       | 18,9            | 13       | 60,0               | 12       | 7,4                          | 7        | 39,7                         | 14       | 0,2        | 5        |
| Mecklenburg-Vorpommern | 45,1        | 1        | 91,7                      | 7        | 42,9             | 14       | 35,3                        | 6        | 54,5             | 4        | 20,6            | 6        | 60,7               | 9        | 7,0                          | 13       | 43,8                         | 8        | 0,1        | 13       |
| Niedersachsen          | 41,0        | 11       | 90,7                      | 8        | 46,8             | 6        | 34,2                        | 10       | 48,0             | 11       | 18,9            | 14       | 60,4               | 10       | 7,1                          | 12       | 52,9                         | 1        | 0,1        | 10       |
| Nordrhein              | 41,2        | 9        | 90,7                      | 9        | 43,7             | 11       | 35,4                        | 5        | 48,1             | 10       | 20,5            | 8        | 63,1               | 4        | 7,8                          | 4        | 46,4                         | 4        | 0,2        | 3        |
| Rheinland-Pfalz        | 40,6        | 15       | 91,8                      | 6        | 47,3             | 4        | 34,6                        | 9        | 48,8             | 9        | 19,8            | 12       | 64,3               | 2        | 7,8                          | 3        | 43,3                         | 9        | 0,2        | 7        |
| Saarland               | 40,6        | 14       | 91,9                      | 5        | 46,8             | 5        | 39,6                        | 1        | 47,5             | 13       | 22,3            | 2        | 65,7               | 1        | 8,9                          | 1        | 43,0                         | 11       | 0,2        | 6        |
| Sachsen                | 40,8        | 12       | 93,1                      | 3        | 48,2             | 3        | 37,5                        | 2        | 52,7             | 7        | 18,6            | 15       | 55,7               | 17       | 7,4                          | 6        | 44,3                         | 6        | 0,0        | 16       |
| Sachsen-Anhalt         | 41,7        | 8        | 93,4                      | 2        | 48,9             | 2        | 36,9                        | 4        | 53,0             | 6        | 21,8            | 4        | 59,2               | 14       | 6,9                          | 16       | 39,7                         | 15       | 0,0        | 17       |
| Schleswig-Holstein     | 41,9        | 7        | 88,0                      | 15       | 40,4             | 15       | 31,3                        | 16       | 45,5             | 15       | 16,5            | 16       | 59,2               | 15       | 7,6                          | 5        | 39,7                         | 16       | 0,1        | 9        |
| Thüringen              | 42,0        | 5        | 93,7                      | 1        | 50,2             | 1        | 37,3                        | 3        | 58,7             | 2        | 20,9            | 5        | 62,8               | 5        | 7,1                          | 10       | 45,9                         | 5        | 0,1        | 14       |
| Westfalen-Lippe        | 42,4        | 4        | 90,3                      | 11       | 45,6             | 8        | 35,1                        | 7        | 50,3             | 8        | 20,5            | 7        | 64,2               | 3        | 7,9                          | 2        | 40,8                         | 13       | 0,1        | 12       |
| <b>Deutschland</b>     | <b>41,5</b> | <b>-</b> | <b>90,7</b>               | <b>-</b> | <b>45,0</b>      | <b>-</b> | <b>34,5</b>                 | <b>-</b> | <b>50,2</b>      | <b>-</b> | <b>20,3</b>     | <b>-</b> | <b>61,3</b>        | <b>-</b> | <b>7,4</b>                   | <b>-</b> | <b>44,7</b>                  | <b>-</b> | <b>0,1</b> | <b>-</b> |

KV: Kassenärztliche Vereinigung

Der Blick auf die chronischen Grunderkrankungen, die die palliative Versorgungssituation ausgelöst haben könnten, zeigt die größte Spanne bei den Nierenerkrankungen mit 40,4% in Bremen und 60,5% in Brandenburg. Eine große Spanne besteht auch bei der Herzinsuffizienz zwischen 37,7% in Bremen und 50,2% in Thüringen. Der Anteil an VS mit Demenzdiagnose variiert zwischen 39,3% in Bremen und 52,9% in Niedersachsen. Atemwegserkrankungen schwanken zwischen 55,6% in Sachsen und 65,1% im Saarland; zerebrovaskuläre Erkrankungen zwischen 30,8% in Bremen und 39,6% im Saarland. Der Anteil an VS mit einer Krebserkrankung reicht von 39,1% in Bremen bis 45,1% in Mecklenburg-Vorpommern.

**Tabelle B-6: Versorgungszugangs-bezogene Wohnkreismerkmale je KV**

| KV                     | Deprivationsindex |      |      | Anteil ländlich lebender EW |      |        |
|------------------------|-------------------|------|------|-----------------------------|------|--------|
|                        | MW                | Min  | Max  | MW                          | Min  | Max    |
| Baden-Württemberg      | 0,40              | 0,18 | 0,74 | 13,1%                       | 0,0% | 70,3%  |
| Bayern                 | 0,35              | 0,00 | 0,72 | 31,0%                       | 0,0% | 100,0% |
| Berlin                 | 0,58              | 0,58 | 0,58 | 0,0%                        | 0,0% | 0,0%   |
| Brandenburg            | 0,64              | 0,42 | 0,85 | 43,6%                       | 0,0% | 100,0% |
| Bremen                 | 0,67              | 0,61 | 0,96 | 0,0%                        | 0,0% | 0,0%   |
| Hamburg                | 0,32              | 0,32 | 0,32 | 0,0%                        | 0,0% | 0,0%   |
| Hessen                 | 0,43              | 0,09 | 0,75 | 14,7%                       | 0,0% | 100,0% |
| Mecklenburg-Vorpommern | 0,73              | 0,67 | 0,78 | 56,1%                       | 0,0% | 83,5%  |
| Niedersachsen          | 0,57              | 0,18 | 0,95 | 32,1%                       | 0,0% | 100,0% |
| Nordrhein              | 0,56              | 0,28 | 0,91 | 1,8%                        | 0,0% | 30,2%  |
| Rheinland-Pfalz        | 0,59              | 0,33 | 0,98 | 27,1%                       | 0,0% | 100,0% |
| Saarland               | 0,66              | 0,50 | 0,76 | 4,9%                        | 0,0% | 23,5%  |
| Sachsen                | 0,60              | 0,44 | 0,72 | 23,5%                       | 0,0% | 46,9%  |
| Sachsen-Anhalt         | 0,76              | 0,64 | 0,87 | 47,6%                       | 0,0% | 100,0% |
| Schleswig-Holstein     | 0,61              | 0,38 | 0,90 | 33,1%                       | 0,0% | 76,2%  |
| Thüringen              | 0,66              | 0,33 | 0,79 | 43,5%                       | 0,0% | 100,0% |
| Westfalen-Lippe        | 0,62              | 0,36 | 1,00 | 9,1%                        | 0,0% | 67,6%  |

*EW: Einwohner, KV: Kassenärztliche Vereinigung, Max: Maximum, Min: Minimum, MW: Mittelwert*

Der durchschnittliche sozioökonomische Deprivationsindex (GISD) variierte 2019 zwischen 0,32 in Hamburg und 0,76 in Sachsen-Anhalt. Der Anteil ländlich lebender Einwohner ist mit 56,1% am höchsten in Mecklenburg-Vorpommern und am niedrigsten in Nordrhein mit 1,8% der VS.

**Tabelle B-7: Inanspruchnahme der Hauptversorgungsformen im Jahr 2019 und 2016 (alters- und geschlechtsstandardisiert)**

| KV                     | AAPV                      |      | BQKpmV                 |      | SAPV                      |      | statPV                  |      | Hospiz                 |      | PV                        |      |
|------------------------|---------------------------|------|------------------------|------|---------------------------|------|-------------------------|------|------------------------|------|---------------------------|------|
|                        | p (CI)                    | Rang | p (CI)                 | Rang | p (CI)                    | Rang | p (CI)                  | Rang | p (CI)                 | Rang | p (CI)                    | Rang |
| <b>2019</b>            |                           |      |                        |      |                           |      |                         |      |                        |      |                           |      |
| Baden-Württemberg      | 22,1 (21,2 - 22,9)        | 7    | 6,4 (5,9 - 6,9)        | 3    | 13,2 (12,5 - 13,9)        | 12   | 8,6 (8,0 - 9,2)         | 12   | 2,9 (2,6 - 3,3)        | 13   | 34,6 (33,6 - 35,6)        | 12   |
| Bayern                 | 35,8 (35,1 - 36,6)        | 1    | 4,3 (4,0 - 4,6)        | 12   | 12,2 (11,7 - 12,8)        | 15   | 13,3 (12,7 - 13,9)      | 2    | 1,6 (1,4 - 1,8)        | 17   | 46,1 (45,3 - 46,9)        | 1    |
| Berlin                 | 17,9 (16,9 - 18,9)        | 15   | 5,4 (4,8 - 6,0)        | 8    | 18,4 (17,4 - 19,4)        | 4    | 11,2 (10,3 - 12,0)      | 5    | 5,4 (4,8 - 6,0)        | 1    | 35,3 (34,0 - 36,5)        | 8    |
| Brandenburg            | 12,5 (11,5 - 13,5)        | 17   | 4,6 (4,0 - 5,2)        | 11   | 20,4 (19,2 - 21,6)        | 2    | 11,0 (10,1 - 11,9)      | 6    | 4,3 (3,8 - 4,9)        | 5    | 32,5 (31,1 - 33,9)        | 14   |
| Bremen                 | 20,5 (17,1 - 24,0)        | 11   | 2,8 (1,3 - 4,3)        | 15   | 10,9 (8,2 - 13,5)         | 16   | 5,1 (3,1 - 7,1)         | 17   | 2,1 (0,9 - 3,2)        | 16   | 29,6 (25,7 - 33,5)        | 16   |
| Hamburg                | 19,8 (18,1 - 21,4)        | 12   | 5,3 (4,3 - 6,2)        | 9    | 16,6 (15,0 - 18,2)        | 7    | 11,2 (9,9 - 12,6)       | 4    | 5,2 (4,3 - 6,2)        | 2    | 33,4 (31,4 - 35,4)        | 13   |
| Hessen                 | 20,6 (19,8 - 21,4)        | 10   | 6,6 (6,1 - 7,1)        | 2    | 20,1 (19,3 - 20,9)        | 3    | 8,1 (7,5 - 8,6)         | 15   | 4,2 (3,8 - 4,6)        | 6    | 35,6 (34,6 - 36,5)        | 6    |
| Mecklenburg-Vorpommern | 22,1 (20,6 - 23,7)        | 6    | 6,1 (5,2 - 7,0)        | 6    | 15,7 (14,4 - 17,0)        | 9    | 9,5 (8,5 - 10,6)        | 10   | 4,5 (3,8 - 5,3)        | 3    | 34,9 (33,2 - 36,7)        | 9    |
| Niedersachsen          | 25,0 (24,2 - 25,8)        | 3    | 5,2 (4,8 - 5,5)        | 10   | 14,6 (13,9 - 15,2)        | 10   | 7,9 (7,5 - 8,4)         | 16   | 3,2 (2,9 - 3,5)        | 11   | 35,9 (35,0 - 36,7)        | 4    |
| Nordrhein              | 24,2 (23,5 - 24,8)        | 5    | 2,4 (2,2 - 2,7)        | 16   | 12,8 (12,3 - 13,3)        | 13   | 9,1 (8,7 - 9,6)         | 11   | 3,8 (3,5 - 4,1)        | 7    | 35,4 (34,7 - 36,1)        | 7    |
| Rheinland-Pfalz        | 24,6 (23,4 - 25,7)        | 4    | 6,4 (5,8 - 7,0)        | 4    | 9,8 (9,0 - 10,6)          | 17   | 10,1 (9,3 - 10,9)       | 9    | 3,1 (2,7 - 3,6)        | 12   | 35,9 (34,6 - 37,1)        | 5    |
| Saarland               | 19,4 (17,3 - 21,5)        | 13   | 8,3 (6,9 - 9,8)        | 1    | 16,7 (14,7 - 18,6)        | 6    | 13,0 (11,3 - 14,8)      | 3    | 4,4 (3,4 - 5,5)        | 4    | 36,9 (34,4 - 39,5)        | 3    |
| Sachsen                | 19,1 (18,1 - 20,1)        | 14   | 5,5 (4,9 - 6,1)        | 7    | 14,3 (13,4 - 15,3)        | 11   | 10,4 (9,6 - 11,2)       | 8    | 2,3 (1,9 - 2,7)        | 15   | 32,1 (30,9 - 33,4)        | 15   |
| Sachsen-Anhalt         | 13,2 (12,1 - 14,4)        | 16   | 6,2 (5,4 - 7,0)        | 5    | 12,5 (11,4 - 13,6)        | 14   | 8,1 (7,2 - 9,0)         | 14   | 3,3 (2,7 - 3,9)        | 10   | 28,9 (27,3 - 30,4)        | 17   |
| Schleswig-Holstein     | 21,6 (20,5 - 22,8)        | 9    | 3,4 (2,9 - 3,9)        | 14   | 15,7 (14,7 - 16,8)        | 8    | 10,5 (9,6 - 11,4)       | 7    | 2,6 (2,2 - 3,1)        | 14   | 34,9 (33,5 - 36,2)        | 10   |
| Thüringen              | 22,0 (20,5 - 23,4)        | 8    | 3,5 (2,9 - 4,2)        | 13   | 17,9 (16,5 - 19,2)        | 5    | 14,6 (13,3 - 15,8)      | 1    | 3,4 (2,8 - 4,0)        | 9    | 37,2 (35,5 - 38,9)        | 2    |
| Westfalen-Lippe        | 26,7 (25,9 - 27,5)        | 2    | 0,8 (0,6 - 0,9)        | 17   | 27,4 (26,6 - 28,2)        | 1    | 8,6 (8,1 - 9,1)         | 13   | 3,8 (3,4 - 4,1)        | 8    | 34,6 (33,8 - 35,5)        | 11   |
| <b>Deutschland</b>     | <b>23,9 (23,7 - 24,1)</b> | -    | <b>4,4 (4,3 - 4,6)</b> | -    | <b>16,0 (15,8 - 16,2)</b> | -    | <b>9,9 (9,7 - 10,1)</b> | -    | <b>3,4 (3,3 - 3,5)</b> | -    | <b>36,2 (36,0 - 36,5)</b> | -    |
| <b>2016</b>            |                           |      |                        |      |                           |      |                         |      |                        |      |                           |      |
| Baden-Württemberg      | 25,1 (24,1 - 26,1)        | 6    | 0,0 (0,0 - 0,0)        | 1    | 10,2 (9,5 - 10,9)         | 14   | 8,4 (7,8 - 9,1)         | 9    | 2,9 (2,6 - 3,3)        | 10   | 32,8 (31,8 - 33,9)        | 7    |
| Bayern                 | 36,6 (35,7 - 37,5)        | 1    | 0,0 (0,0 - 0,0)        | 1    | 10,4 (9,9 - 11,0)         | 13   | 11,9 (11,3 - 12,5)      | 1    | 2,1 (1,9 - 2,4)        | 14   | 43,2 (42,2 - 44,1)        | 1    |
| Berlin                 | 20,1 (18,9 - 21,3)        | 14   | 0,0 (0,0 - 0,0)        | 1    | 16,7 (15,6 - 17,8)        | 4    | 8,7 (7,8 - 9,6)         | 8    | 5,7 (5,0 - 6,4)        | 1    | 33,0 (31,6 - 34,4)        | 5    |
| Brandenburg            | 17,8 (16,5 - 19,1)        | 16   | 0,0 (0,0 - 0,0)        | 1    | 17,5 (16,2 - 18,7)        | 2    | 10,0 (9,0 - 10,9)       | 6    | 4,6 (3,9 - 5,3)        | 4    | 30,5 (28,9 - 32,1)        | 14   |
| Bremen                 | 21,6 (17,6 - 25,5)        | 13   | 0,0 (0,0 - 0,0)        | 1    | 8,0 (5,3 - 10,7)          | 16   | 7,6 (5,0 - 10,3)        | 16   | 1,7 (0,4 - 3,0)        | 17   | 27,8 (23,4 - 32,2)        | 16   |
| Hamburg                | 22,8 (21,0 - 24,7)        | 12   | 0,0 (0,0 - 0,0)        | 1    | 14,3 (12,7 - 15,9)        | 5    | 11,1 (9,6 - 12,5)       | 3    | 5,7 (4,7 - 6,8)        | 2    | 32,6 (30,5 - 34,7)        | 10   |
| Hessen                 | 24,8 (23,9 - 25,7)        | 7    | 0,0 (0,0 - 0,0)        | 1    | 17,1 (16,3 - 17,9)        | 3    | 7,7 (7,1 - 8,3)         | 14   | 3,7 (3,3 - 4,1)        | 7    | 34,3 (33,3 - 35,3)        | 3    |
| Mecklenburg-Vorpommern | 26,0 (24,1 - 27,9)        | 4    | 0,0 (0,0 - 0,0)        | 1    | 14,3 (12,8 - 15,7)        | 6    | 10,8 (9,5 - 12,1)       | 4    | 4,9 (4,0 - 5,8)        | 3    | 34,3 (32,2 - 36,4)        | 4    |
| Niedersachsen          | 29,2 (28,3 - 30,2)        | 2    | 0,0 (0,0 - 0,0)        | 1    | 12,5 (11,8 - 13,3)        | 10   | 7,5 (6,9 - 8,1)         | 17   | 3,4 (3,0 - 3,8)        | 9    | 36,1 (35,1 - 37,1)        | 2    |
| Nordrhein              | 25,3 (24,6 - 26,0)        | 5    | 0,0 (0,0 - 0,0)        | 1    | 9,1 (8,7 - 9,6)           | 15   | 7,9 (7,5 - 8,4)         | 13   | 3,8 (3,5 - 4,1)        | 5    | 32,5 (31,8 - 33,3)        | 11   |
| Rheinland-Pfalz        | 26,2 (25,0 - 27,5)        | 3    | 0,0 (0,0 - 0,0)        | 1    | 6,2 (5,5 - 6,8)           | 17   | 9,6 (8,7 - 10,4)        | 7    | 2,8 (2,4 - 3,3)        | 11   | 32,8 (31,5 - 34,1)        | 8    |
| Saarland               | 24,3 (21,9 - 26,7)        | 9    | 0,0 (0,0 - 0,0)        | 1    | 13,7 (11,8 - 15,6)        | 7    | 10,5 (8,8 - 12,1)       | 5    | 3,6 (2,6 - 4,6)        | 8    | 32,7 (30,1 - 35,3)        | 9    |

Onlinematerial zum Beitrag: „Inanspruchnahme von Palliativversorgung am Lebensende in Deutschland: zeitlicher Verlauf (2016-2019) und regionale Variabilität“

| KV                 | AAPV                      |      | BQKpMv                 |      | SAPV                      |      | statPV                 |      | Hospiz                 |      | PV                        |      |
|--------------------|---------------------------|------|------------------------|------|---------------------------|------|------------------------|------|------------------------|------|---------------------------|------|
|                    | p (CI)                    | Rang | p (CI)                 | Rang | p (CI)                    | Rang | p (CI)                 | Rang | p (CI)                 | Rang | p (CI)                    | Rang |
| Sachsen            | 19,2 (18,0 - 20,4)        | 15   | 0,0 (0,0 - 0,0)        | 1    | 11,6 (10,6 - 12,6)        | 11   | 8,3 (7,5 - 9,2)        | 10   | 2,0 (1,6 - 2,4)        | 16   | 27,9 (26,5 - 29,2)        | 15   |
| Sachsen-Anhalt     | 17,4 (15,9 - 18,9)        | 17   | 0,0 (0,0 - 0,0)        | 1    | 11,5 (10,3 - 12,7)        | 12   | 8,2 (7,2 - 9,2)        | 11   | 2,7 (2,1 - 3,3)        | 12   | 27,3 (25,6 - 29,0)        | 17   |
| Schleswig-Holstein | 23,9 (22,7 - 25,2)        | 10   | 0,0 (0,0 - 0,0)        | 1    | 13,0 (12,0 - 14,0)        | 9    | 7,7 (6,8 - 8,5)        | 15   | 2,1 (1,7 - 2,5)        | 15   | 31,6 (30,3 - 33,0)        | 12   |
| Thüringen          | 23,2 (21,4 - 24,9)        | 11   | 0,0 (0,0 - 0,0)        | 1    | 13,4 (12,0 - 14,8)        | 8    | 11,8 (10,6 - 13,1)     | 2    | 2,6 (2,0 - 3,3)        | 13   | 32,9 (30,9 - 34,8)        | 6    |
| Westfalen-Lippe    | 24,6 (23,8 - 25,4)        | 8    | 0,0 (0,0 - 0,0)        | 1    | 23,8 (23,0 - 24,6)        | 1    | 8,1 (7,5 - 8,6)        | 12   | 3,8 (3,4 - 4,1)        | 6    | 31,4 (30,5 - 32,3)        | 13   |
| <b>Deutschland</b> | <b>25,8 (25,5 - 26,0)</b> | -    | <b>0,0 (0,0 - 0,0)</b> | -    | <b>13,3 (13,1 - 13,5)</b> | -    | <b>8,9 (8,7 - 9,1)</b> | -    | <b>3,4 (3,2 - 3,5)</b> | -    | <b>33,8 (33,5 - 34,1)</b> | -    |

CI: Konfidenzintervall (Confidence interval), KV: Kassenärztliche Vereinigung, p: Anteil (Proportion)





**Tabelle B-9: Inanspruchnahmeraten weiterer ausgewählter Indikatoren<sup>#</sup> für die Inanspruchnahme von Palliativversorgung im Jahr 2019 und 2016 – Teil B**

| KV                     | HKPpall                |          | HKP ab ambulanter PV   |          | ambulante Pflege          |          | SAPV-VO                |          | SAPV-VO aus Krankenhaus |          | SAPV ohne AAPV und ohne BQKPMV |          | Stationäre PV ohne ambulante PV |          | Tageshospiz            |          |
|------------------------|------------------------|----------|------------------------|----------|---------------------------|----------|------------------------|----------|-------------------------|----------|--------------------------------|----------|---------------------------------|----------|------------------------|----------|
|                        | p (CI)                 | Rang     | p (CI)                 | Rang     | p (CI)                    | Rang     | p (CI)                 | Rang     | p (CI)                  | Rang     | p (CI)                         | Rang     | p (CI)                          | Rang     | p (CI)                 | Rang     |
| <b>2019</b>            |                        |          |                        |          |                           |          |                        |          |                         |          |                                |          |                                 |          |                        |          |
| Baden-Württemberg      | 0,0 (0,0 - 0,0)        | 7        | 5,7 (5,2 - 6,2)        | 5        | 57,9 (56,9 - 58,9)        | 8        | 6,4 (5,9 - 6,9)        | 16       | 3,4 (3,0 - 3,8)         | 11       | 6,0 (5,5 - 6,4)                | 11       | 3,1 (2,7 - 3,4)                 | 12       | 0,0 (0,0 - 0,0)        | 10       |
| Bayern                 | 0,0 (0,0 - 0,0)        | 7        | 6,3 (5,9 - 6,7)        | 4        | 52,7 (51,9 - 53,5)        | 16       | 7,9 (7,5 - 8,4)        | 12       | 2,7 (2,5 - 3,0)         | 14       | 3,1 (2,9 - 3,4)                | 17       | 5,2 (4,8 - 5,5)                 | 1        | 0,0 (0,0 - 0,1)        | 5        |
| Berlin                 | 0,0 (0,0 - 0,1)        | 5        | 2,6 (2,2 - 3,1)        | 16       | 52,4 (51,1 - 53,7)        | 17       | 16,1 (15,1 - 17,0)     | 1        | 1,6 (1,2 - 1,9)         | 16       | 11,0 (10,2 - 11,8)             | 2        | 4,0 (3,5 - 4,6)                 | 5        | 0,0 (0,0 - 0,0)        | 10       |
| Brandenburg            | 0,0 (0,0 - 0,0)        | 6        | 3,8 (3,3 - 4,4)        | 14       | 55,9 (54,4 - 57,4)        | 11       | 12,7 (11,8 - 13,7)     | 4        | 6,4 (5,7 - 7,1)         | 1        | 12,7 (11,8 - 13,7)             | 1        | 4,3 (3,7 - 4,9)                 | 4        | 0,0 (0,0 - 0,1)        | 2        |
| Bremen                 | 0,0 (0,0 - 0,0)        | 7        | 4,0 (2,3 - 5,6)        | 11       | 59,7 (55,5 - 64,0)        | 1        | 6,6 (4,5 - 8,7)        | 15       | 2,8 (1,5 - 4,2)         | 13       | 5,7 (3,7 - 7,7)                | 13       | 1,9 (0,6 - 3,1)                 | 17       | 0,2 (-0,2 - 0,6)       | 1        |
| Hamburg                | 0,0 (0,0 - 0,0)        | 7        | 2,6 (1,9 - 3,3)        | 17       | 54,7 (52,6 - 56,8)        | 14       | 10,9 (9,6 - 12,2)      | 9        | 3,8 (3,0 - 4,7)         | 8        | 6,7 (5,7 - 7,8)                | 8        | 3,8 (3,0 - 4,6)                 | 7        | 0,0 (0,0 - 0,1)        | 4        |
| Hessen                 | 0,0 (0,0 - 0,0)        | 7        | 5,5 (5,1 - 6,0)        | 6        | 58,4 (57,5 - 59,4)        | 4        | 14,2 (13,5 - 14,9)     | 2        | 5,6 (5,1 - 6,0)         | 3        | 9,1 (8,5 - 9,7)                | 3        | 2,8 (2,4 - 3,1)                 | 15       | 0,0 (0,0 - 0,0)        | 10       |
| Mecklenburg-Vorpommern | 0,0 (0,0 - 0,0)        | 7        | 8,3 (7,3 - 9,3)        | 1        | 59,2 (57,3 - 61,0)        | 2        | 11,5 (10,3 - 12,7)     | 6        | 3,5 (2,8 - 4,1)         | 10       | 5,7 (4,9 - 6,6)                | 12       | 2,9 (2,3 - 3,5)                 | 14       | 0,0 (0,0 - 0,1)        | 6        |
| Niedersachsen          | 0,0 (0,0 - 0,0)        | 7        | 4,4 (4,1 - 4,8)        | 10       | 56,8 (55,9 - 57,7)        | 10       | 11,3 (10,7 - 11,9)     | 8        | 3,4 (3,1 - 3,7)         | 12       | 5,4 (5,0 - 5,8)                | 14       | 2,6 (2,3 - 2,9)                 | 16       | 0,0 (0,0 - 0,0)        | 9        |
| Nordrhein              | 1,9 (1,7 - 2,1)        | 2        | 3,9 (3,6 - 4,2)        | 13       | 59,0 (58,3 - 59,8)        | 3        | 8,7 (8,3 - 9,2)        | 10       | 3,6 (3,3 - 3,9)         | 9        | 6,2 (5,8 - 6,5)                | 10       | 3,6 (3,3 - 3,8)                 | 9        | 0,0 (0,0 - 0,1)        | 3        |
| Rheinland-Pfalz        | 0,0 (0,0 - 0,1)        | 4        | 4,9 (4,4 - 5,5)        | 8        | 57,0 (55,7 - 58,3)        | 9        | 6,7 (6,0 - 7,4)        | 14       | 2,7 (2,3 - 3,1)         | 15       | 4,0 (3,5 - 4,5)                | 16       | 3,9 (3,3 - 4,4)                 | 6        | 0,0 (0,0 - 0,0)        | 10       |
| Saarland               | 0,0 (0,0 - 0,0)        | 7        | 3,9 (2,9 - 4,9)        | 12       | 58,2 (55,6 - 60,8)        | 6        | 13,1 (11,3 - 14,8)     | 3        | 4,0 (3,0 - 5,0)         | 7        | 7,4 (6,0 - 8,7)                | 6        | 4,5 (3,4 - 5,6)                 | 3        | 0,0 (0,0 - 0,0)        | 10       |
| Sachsen                | 0,0 (0,0 - 0,0)        | 7        | 7,0 (6,4 - 7,7)        | 2        | 55,1 (53,8 - 56,5)        | 13       | 8,7 (7,9 - 9,4)        | 11       | 4,5 (3,9 - 5,0)         | 5        | 6,6 (6,0 - 7,3)                | 9        | 3,5 (3,0 - 4,0)                 | 10       | 0,0 (0,0 - 0,0)        | 10       |
| Sachsen-Anhalt         | 0,1 (0,0 - 0,2)        | 3        | 5,5 (4,7 - 6,2)        | 7        | 55,5 (53,8 - 57,3)        | 12       | 7,0 (6,1 - 7,8)        | 13       | 4,4 (3,7 - 5,0)         | 6        | 7,5 (6,7 - 8,4)                | 5        | 3,1 (2,5 - 3,7)                 | 11       | 0,0 (0,0 - 0,1)        | 8        |
| Schleswig-Holstein     | 0,0 (0,0 - 0,0)        | 7        | 3,7 (3,2 - 4,2)        | 15       | 54,1 (52,7 - 55,5)        | 15       | 11,3 (10,4 - 12,2)     | 7        | 4,6 (4,0 - 5,2)         | 4        | 7,3 (6,6 - 8,1)                | 7        | 3,6 (3,1 - 4,2)                 | 8        | 0,0 (0,0 - 0,0)        | 10       |
| Thüringen              | 0,0 (0,0 - 0,0)        | 7        | 6,9 (6,0 - 7,7)        | 3        | 58,4 (56,6 - 60,2)        | 5        | 12,6 (11,5 - 13,8)     | 5        | 5,8 (4,9 - 6,6)         | 2        | 8,2 (7,2 - 9,2)                | 4        | 5,1 (4,3 - 5,9)                 | 2        | 0,0 (0,0 - 0,0)        | 10       |
| Westfalen-Lippe        | 3,7 (3,4 - 4,1)        | 1        | 4,9 (4,5 - 5,3)        | 9        | 58,0 (57,1 - 58,9)        | 7        | 0,3 (0,2 - 0,4)        | 17       | n.e.                    | -        | 4,5 (4,1 - 4,8)                | 15       | 3,1 (2,8 - 3,4)                 | 13       | 0,0 (0,0 - 0,1)        | 7        |
| <b>Deutschland</b>     | <b>0,7 (0,6 - 0,7)</b> | <b>-</b> | <b>5,0 (4,9 - 5,1)</b> | <b>-</b> | <b>56,5 (56,3 - 56,8)</b> | <b>-</b> | <b>9,0 (8,9 - 9,2)</b> | <b>-</b> | <b>3,8 (3,7 - 3,9)</b>  | <b>-</b> | <b>6,3 (6,2 - 6,4)</b>         | <b>-</b> | <b>3,6 (3,5 - 3,7)</b>          | <b>-</b> | <b>0,0 (0,0 - 0,0)</b> | <b>-</b> |
| <b>2016</b>            |                        |          |                        |          |                           |          |                        |          |                         |          |                                |          |                                 |          |                        |          |
| Baden-Württemberg      | 0,0 (0,0 - 0,0)        | 6        | 5,6 (5,1 - 6,1)        | 7        | 51,3 (50,2 - 52,4)        | 9        | 5,3 (4,8 - 5,8)        | 15       | 2,8 (2,5 - 3,2)         | 12       | 4,3 (3,9 - 4,8)                | 12       | 3,3 (2,9 - 3,7)                 | 7        | 0,0 (0,0 - 0,0)        | 10       |
| Bayern                 | 0,0 (0,0 - 0,0)        | 5        | 6,5 (6,1 - 7,0)        | 3        | 45,6 (44,6 - 46,5)        | 17       | 6,3 (5,9 - 6,8)        | 11       | 3,0 (2,6 - 3,3)         | 10       | 2,6 (2,3 - 2,8)                | 17       | 4,0 (3,6 - 4,3)                 | 2        | 0,0 (0,0 - 0,0)        | 7        |
| Berlin                 | 0,0 (0,0 - 0,0)        | 6        | 2,9 (2,4 - 3,4)        | 17       | 46,4 (44,9 - 47,9)        | 15       | 16,2 (15,1 - 17,3)     | 1        | 0,3 (0,2 - 0,5)         | 16       | 9,9 (9,0 - 10,8)               | 1        | 3,0 (2,5 - 3,5)                 | 11       | 0,1 (0,0 - 0,1)        | 4        |
| Brandenburg            | 0,0 (0,0 - 0,0)        | 6        | 4,6 (3,9 - 5,3)        | 12       | 53,2 (51,5 - 55,0)        | 3        | 11,8 (10,7 - 12,9)     | 3        | 5,8 (5,1 - 6,6)         | 1        | 9,3 (8,3 - 10,3)               | 2        | 3,3 (2,7 - 3,9)                 | 6        | 0,0 (0,0 - 0,0)        | 10       |
| Bremen                 | 0,0 (0,0 - 0,0)        | 6        | 5,5 (3,3 - 7,7)        | 8        | 54,6 (49,8 - 59,5)        | 2        | 6,0 (3,6 - 8,4)        | 12       | 1,9 (0,5 - 3,3)         | 15       | 3,8 (1,9 - 5,8)                | 14       | 2,4 (0,9 - 4,0)                 | 15       | 0,0 (0,0 - 0,0)        | 10       |
| Hamburg                | 0,0 (0,0 - 0,0)        | 6        | 3,8 (3,0 - 4,7)        | 16       | 49,2 (47,0 - 51,4)        | 14       | 8,8 (7,5 - 10,1)       | 8        | 4,0 (3,1 - 4,8)         | 5        | 5,9 (4,8 - 7,0)                | 5        | 3,9 (3,0 - 4,8)                 | 4        | 0,1 (-0,1 - 0,2)       | 3        |
| Hessen                 | 0,0 (0,0 - 0,0)        | 3        | 6,1 (5,6 - 6,6)        | 5        | 53,0 (51,9 - 54,1)        | 4        | 12,2 (11,5 - 12,9)     | 2        | 4,7 (4,2 - 5,2)         | 2        | 7,0 (6,4 - 7,5)                | 3        | 2,5 (2,1 - 2,8)                 | 14       | 0,0 (0,0 - 0,0)        | 9        |
| Mecklenburg-Vorpommern | 0,0 (0,0 - 0,0)        | 6        | 9,1 (7,9 - 10,3)       | 1        | 58,0 (55,8 - 60,2)        | 1        | 9,3 (8,1 - 10,5)       | 7        | 4,7 (3,8 - 5,5)         | 3        | 5,0 (4,1 - 6,0)                | 9        | 3,0 (2,3 - 3,7)                 | 10       | 0,0 (0,0 - 0,0)        | 10       |
| Niedersachsen          | 0,0 (0,0 - 0,0)        | 4        | 4,7 (4,3 - 5,2)        | 11       | 52,6 (51,5 - 53,6)        | 7        | 9,7 (9,0 - 10,3)       | 5        | 2,8 (2,4 - 3,1)         | 13       | 4,4 (4,0 - 4,9)                | 11       | 2,4 (2,1 - 2,7)                 | 16       | 0,1 (0,0 - 0,1)        | 2        |
| Nordrhein              | 2,2 (2,0 - 2,5)        | 2        | 4,1 (3,8 - 4,4)        | 14       | 52,8 (52,0 - 53,6)        | 6        | 5,9 (5,5 - 6,2)        | 14       | 2,8 (2,6 - 3,1)         | 11       | 4,2 (3,9 - 4,5)                | 13       | 2,9 (2,7 - 3,2)                 | 13       | 0,0 (0,0 - 0,1)        | 5        |
| Rheinland-Pfalz        | 0,0 (0,0 - 0,0)        | 6        | 4,9 (4,3 - 5,5)        | 9        | 51,5 (50,1 - 52,9)        | 8        | 3,4 (2,9 - 3,9)        | 16       | 2,3 (1,9 - 2,7)         | 14       | 2,6 (2,1 - 3,0)                | 16       | 3,9 (3,4 - 4,5)                 | 3        | 0,0 (0,0 - 0,0)        | 8        |
| Saarland               | 0,0 (0,0 - 0,0)        | 6        | 4,0 (2,9 - 5,1)        | 15       | 53,0 (50,2 - 55,8)        | 5        | 11,0 (9,2 - 12,8)      | 4        | 3,0 (2,1 - 3,9)         | 9        | 4,8 (3,6 - 6,0)                | 10       | 3,4 (2,4 - 4,4)                 | 5        | 0,0 (0,0 - 0,0)        | 10       |
| Sachsen                | 0,0 (0,0 - 0,0)        | 6        | 7,3 (6,5 - 8,1)        | 2        | 49,9 (48,4 - 51,5)        | 13       | 7,5 (6,7 - 8,3)        | 10       | 3,4 (2,8 - 3,9)         | 7        | 5,3 (4,7 - 6,0)                | 8        | 3,3 (2,7 - 3,8)                 | 9        | 0,0 (0,0 - 0,0)        | 10       |
| Sachsen-Anhalt         | 0,0 (0,0 - 0,0)        | 6        | 5,8 (4,9 - 6,6)        | 6        | 51,1 (49,1 - 53,0)        | 11       | 5,9 (5,0 - 6,7)        | 13       | 3,9 (3,2 - 4,6)         | 6        | 6,4 (5,5 - 7,3)                | 4        | 3,3 (2,6 - 4,0)                 | 8        | 0,1 (0,0 - 0,2)        | 1        |
| Schleswig-Holstein     | 0,0 (0,0 - 0,0)        | 6        | 4,5 (3,9 - 5,2)        | 13       | 46,2 (44,8 - 47,7)        | 16       | 8,8 (7,9 - 9,6)        | 9        | 4,2 (3,6 - 4,8)         | 4        | 5,4 (4,7 - 6,1)                | 7        | 2,3 (1,9 - 2,8)                 | 17       | 0,0 (0,0 - 0,0)        | 10       |

Onlinematerial zum Beitrag: „Inanspruchnahme von Palliativversorgung am Lebensende in Deutschland: zeitlicher Verlauf (2016-2019) und regionale Variabilität“

| KV                 | HKPpall                |      | HKP ab ambulanter PV   |      | ambulante Pflege          |      | SAPV-VO                |      | SAPV-VO aus Krankenhaus |      | SAPV ohne AAPV und ohne BQKPMV |      | Stationäre PV ohne ambulante PV |      | Tageshospiz            |      |
|--------------------|------------------------|------|------------------------|------|---------------------------|------|------------------------|------|-------------------------|------|--------------------------------|------|---------------------------------|------|------------------------|------|
|                    | p (CI)                 | Rang | p (CI)                 | Rang | p (CI)                    | Rang | p (CI)                 | Rang | p (CI)                  | Rang | p (CI)                         | Rang | p (CI)                          | Rang | p (CI)                 | Rang |
| Thüringen          | 0,0 (0,0 - 0,0)        | 6    | 6,3 (5,3 - 7,3)        | 4    | 50,2 (48,1 - 52,3)        | 12   | 9,4 (8,2 - 10,6)       | 6    | 3,0 (2,4 - 3,7)         | 8    | 5,5 (4,5 - 6,4)                | 6    | 4,3 (3,5 - 5,0)                 | 1    | 0,0 (0,0 - 0,0)        | 10   |
| Westfalen-Lippe    | 3,9 (3,5 - 4,3)        | 1    | 4,8 (4,4 - 5,3)        | 10   | 51,1 (50,1 - 52,0)        | 10   | 0,2 (0,1 - 0,2)        | 17   | n.e.                    | -    | 3,8 (3,4 - 4,1)                | 15   | 2,9 (2,6 - 3,3)                 | 12   | 0,0 (0,0 - 0,0)        | 6    |
| <b>Deutschland</b> | <b>0,8 (0,7 - 0,9)</b> | -    | <b>5,2 (5,1 - 5,4)</b> | -    | <b>50,7 (50,4 - 51,1)</b> | -    | <b>7,2 (7,0 - 7,3)</b> | -    | <b>3,2 (3,1 - 3,3)</b>  | -    | <b>4,8 (4,7 - 5,0)</b>         | -    | <b>3,1 (3,0 - 3,2)</b>          | -    | <b>0,0 (0,0 - 0,0)</b> | -    |

#Erläuterungen zu den Indikatoren: siehe Tabelle A-3; CI: Konfidenzintervall (Confidence interval), KV: Kassenärztliche Vereinigung, p: Anteil (Proportion)

Zieht man lediglich bundesweit geltende Abrechnungsziffern für palliative Leistungen heran, anstatt regionale und KV-spezifische Leistungs- und Sonderziffern für ambulante und stationäre palliativmedizinische Leistungen zu berücksichtigen, so betragen die entsprechenden Anteile an palliativ versorgten VS nur 28,3% im Jahr 2016 und 29,7% im Jahr 2019 (siehe PV nur Bundesziffern). Die dadurch induzierte Unterschätzung der Inanspruchnahme liegt demnach bei etwa 6 Prozentpunkten (bzw. relativ bei -18%).

Nimmt man Westfalen-Lippe aufgrund der dort abweichenden ambulanten PV-Praxis aus der Durchschnittsrechnung für den Bund heraus, so errechnet sich eine bundesdurchschnittliche SAPV-Inanspruchnahme 2016 von 12,0% und 2019 von 14,7%.

**Tabelle B-10: Odds Ratios der Kovariaten, die zur Adjustierung der Daten 2019 herangezogen wurden (einfache Regression mit Inanspruchnahme von PV insgesamt als abhängiger Variable)**

|                                           | PV   |     |
|-------------------------------------------|------|-----|
|                                           | OR   | p   |
| Alter                                     | 1,00 | ns  |
| Geschlecht                                | 1,20 | *** |
| CCI (gewichtet)                           | 1,19 | *** |
| Tumor                                     | 4,41 | *** |
| Herz-Kreislauf-Erkrankung                 | 1,00 | ns  |
| Herzinsuffizienz                          | 0,80 | *** |
| Zerebrovaskuläre Erkrankung               | 0,90 | *** |
| Nierenerkrankung                          | 0,95 | *** |
| Lebererkrankung                           | 1,10 | *** |
| Atemwegserkrankung                        | 0,90 | *** |
| Neurodegenerative Erkrankung              | 1,09 | *** |
| Demenz, Alzheimer, Senilität              | 1,13 | *** |
| HIV, AIDS                                 | 0,93 | ns  |
| Pflegebedarf: Häuslichkeit mit Pflegegrad | 5,51 | *** |
| Pflegebedarf: Pflegeheim                  | 4,13 | *** |
| Deprivationsindex                         | 0,58 | *** |
| Anteil ländlich lebender EW               | 1,08 | **  |

CCI: Charlson Comorbidity Index, EW: Einwohner, ns: nicht significant, OR: Odds ratio, p: p-Wert, PV: Palliativversorgung, \*\*\*  $p < .001$ , \*\*  $p < .01$

**Tabelle B-11: Adjustierter zeitlicher Trend in den Inanspruchnahmeraten gemittelt über alle KVen sowie adjustierte KV-spezifische Abweichung vom mittleren Trend<sup>#</sup>**

|                        | AAPV                 |                           | SAPV                 |                           | Stat. PV             |                           | Hospiz               |                           | PV                   |                           |
|------------------------|----------------------|---------------------------|----------------------|---------------------------|----------------------|---------------------------|----------------------|---------------------------|----------------------|---------------------------|
| Mittlerer Zeittrend    | 0,92                 | ***                       | 1,06                 | ***                       | 1,06                 | ***                       | 0,90                 | ***                       | 1,02                 | **                        |
|                        | Zeittrend-abweichung | KV-spezifischer Zeittrend | Zeittrend-abweichung | KV-spezifischer Zeittrend | Zeittrend-abweichung | KV-spezifischer Zeittrend | Zeittrend-abweichung | KV-spezifischer Zeittrend | Zeittrend-abweichung | KV-spezifischer Zeittrend |
| Baden-Württemberg      | 1,00                 | ns                        | 1,04                 | *                         | 1,10                 | ***                       | 0,97                 | +                         | 1,00                 | ns                        |
| Bayern                 | 1,03                 | **                        | 0,94                 | ***                       | 0,98                 | ns                        | 1,03                 | *                         | 1,09                 | ***                       |
| Berlin                 | 1,02                 | ns                        | 0,94                 | ***                       | 1,00                 | ns                        | 1,07                 | **                        | 1,14                 | ***                       |
| Brandenburg            | 0,93                 | **                        | 0,86                 | ***                       | 1,02                 | ns                        | 1,03                 | ns                        | 1,01                 | ns                        |
| Bremen                 | 1,04                 | ns                        | 1,02                 | ns                        | 0,84                 | *                         | 0,88                 | ns                        | 0,97                 | ns                        |
| Hamburg                | 0,99                 | ns                        | 0,99                 | ns                        | 1,01                 | ns                        | 0,98                 | ns                        | 0,97                 | ns                        |
| Hessen                 | 0,96                 | **                        | 0,88                 | ***                       | 0,98                 | ns                        | 0,99                 | ns                        | 1,03                 | ns                        |
| Mecklenburg-Vorpommern | 1,01                 | ns                        | 1,00                 | ns                        | 0,93                 | *                         | 0,98                 | ns                        | 0,98                 | ns                        |
| Niedersachsen          | 0,97                 | *                         | 0,89                 | ***                       | 0,97                 | *                         | 1,03                 | *                         | 0,99                 | ns                        |
| Nordrhein              | 1,03                 | **                        | 0,95                 | ***                       | 1,04                 | **                        | 1,11                 | ***                       | 1,02                 | ns                        |
| Rheinland-Pfalz        | 1,01                 | ns                        | 1,10                 | ***                       | 1,17                 | ***                       | 0,97                 | ns                        | 0,98                 | ns                        |
| Saarland               | 0,93                 | *                         | 0,85                 | ***                       | 1,00                 | ns                        | 1,06                 | ns                        | 1,03                 | ns                        |
| Sachsen                | 1,05                 | *                         | 0,96                 | *                         | 0,99                 | ns                        | 1,04                 | +                         | 1,06                 | ns                        |
| Sachsen-Anhalt         | 0,94                 | *                         | 0,86                 | ***                       | 0,96                 | ns                        | 0,97                 | ns                        | 1,10                 | +                         |
| Schleswig-Holstein     | 0,99                 | ns                        | 0,97                 | ns                        | 1,08                 | **                        | 1,14                 | ***                       | 1,03                 | ns                        |
| Thüringen              | 1,02                 | ns                        | 1,04                 | ns                        | 1,06                 | *                         | 1,12                 | ***                       | 1,09                 | ns                        |
| Westfalen-Lippe        | 1,11                 | ***                       | 1,02                 | *                         | 0,98                 | ns                        | 0,98                 | ns                        | 1,00                 | ns                        |

<sup>#</sup>Anmerkung: Dargestellt sind Odds Ratios des mittleren Zeittrends und der Abweichung der 17 KVen vom mittleren Zeittrend mit ihrer jeweiligen Signifikanz. Für KVen, deren Zeittrend signifikant (mit  $p < .05$ ) vom mittleren Zeittrend abweicht, ist zusätzlich auch der KV-spezifische Zeittrend ausgewiesen. \*\*\*  $p < .001$ , \*\*  $p < .01$ , \*  $p < .05$ , +  $p < .10$ . KV: Kassenärztliche Vereinigung

Nach Adjustierung ändern sich die Schlussfolgerungen bzgl. der mittleren Zeittrends nicht, mit einer einzigen Ausnahme: Der mittlere Zeittrend ist bei der Hospizinanspruchnahme nun signifikant negativ (vorher: nicht signifikant).

Bei den KV-spezifischen Abweichungen vom mittleren Zeittrends gibt es einige wenige Änderungen: AAPV: Nun weicht auch Niedersachsen ab, der Zeittrend ist hier stärker abfallend als der mittlere Trend; Sachsen weicht noch immer signifikant ab, der Trend in Sachsen ist nun aber nicht mehr ns, sondern abfallend (aber weniger stark als im Mittel der KVen). SAPV: auch in Baden-Württemberg zeigt sich nun eine stärkere Zunahme über die Zeit als im Mittel der KVen; auch bei Niedersachsen gibt es nun eine Abweichung: Hier ist die Zunahme über die Zeit weniger stark als im Mittel der KVen, aber immer noch signifikant. Stationäre PV: Bayern und Berlin zeigen nun einen stärkeren Anstieg über die Zeit, Bremen einen schwächeren (der dann auch nicht mehr signifikant ist). Hospiz: keine anderen Schlussfolgerungen bzgl. der KV-spezifischen Effekte. PV gesamt: in Hessen zeigt sich ein schwächerer Zeittrend (genauer: kein Anstieg über die Zeit); in Niedersachsen ist der abweichende Zeittrend nun nicht mehr wie vorher ns sondern sogar signifikant abfallend.

## C. eDiskussion: Ergänzungen zur Diskussion

### C.1 Stärken und Schwächen

Die Stärken der vorliegenden Studie liegen sowohl in der bundesweiten Betrachtung der Inanspruchnahme von PV und dem Vergleich aller 17 KVen, als auch in der umfassenden Berücksichtigung verfügbarer Abrechnungsziffern für Verordnungen und Leistungen palliativmedizinischer und -pflegerischer Versorgung. Ohne diese wird die Inanspruchnahme von PV in Deutschland massiv unterschätzt, wie es leider in diversen Studien der Fall war und weiter ist [19–23]. Darüber hinaus bringt die Differenzierung der fünf Hauptformen der PV z.B. nach der SAPV-Erstverordnung im Krankenhaus, der Abrechnung geriatrischer Leistungen, häuslicher Krankenpflegeleistungen sowie durch kombinierte Inanspruchnahme-Abfragen wie „SAPV ohne AAPV/BQKpMv“ – eine bislang nicht dagewesene Transparenz in die Inanspruchnahme palliativer Versorgungsleistungen in Deutschland.

Mit den um ausgewählte, in GKV-Routinedaten verfügbare Patienten- und Wohnkreismerkmale adjustierten regionalen Inanspruchnahmeraten wird erstmals empirisch gezeigt, dass diese versorgungsbedarfs- und versorgungszugangsbezogenen Merkmale die großen regionalen Unterschiede in der Inanspruchnahme der verschiedenen PV-Formen nicht erklären. Dies ist eine Beobachtung, aus der sich wichtige Schlüsse für die Weiterentwicklung der Palliativversorgung ziehen lassen.

Limitierend ist, dass anhand der uns vorliegenden Daten keine valide Aussage darüber möglich ist, ob palliative Versorgung überhaupt bzw. die abgerechnete Form der Palliativversorgung indiziert war bzw. objektiver Bedarf dafür bestand. Diese Einschränkung gilt grundsätzlich sowohl für palliativ versorgte wie nicht palliativ versorgte VS. Limitierend ist ebenfalls, dass die Angabe, dass PV abgerechnet wurde, keine Aussage darüber ermöglicht, inwieweit die betreffende Form der Palliativversorgung ausreichend früh und intensiv zum Einsatz kam. Entsprechend unsicher sind abgeleitete Aussagen über potenziell ungedeckten Versorgungsbedarf. Limitierend ist weiterhin, dass die Studienergebnisse trotz der vorgenommenen Alters- und Geschlechtsstandardisierung nur eingeschränkt auf die gesamte GKV-Population übertragbar sind; dies ist auf die unterschiedlichen Anteile der BARMER-Versicherten in den einzelnen KV-Regionen (vgl. Tabelle B-3: Studienpopulation vs. alle Sterbefälle je Bundesland im gesamten Zeitraum 2016-2019) und die potenziellen Spezifika der durch die BARMER geschlossenen Selektivverträge zur PV zurückzuführen. Die Zuordnung palliativer Leistungen erfolgte anhand der KV-Region der Versicherten unabhängig davon, wo die Leistung erbracht wurde.

Wir bewerteten die Daten bisher nur bis einschließlich 2019. Potenzielle Verschiebungen in der Inanspruchnahme von PV durch die SARS-CoV-2-Pandemie sind erst analysierbar, wenn 2020er und 2021er Daten verfügbar und ausgewertet sind. Erste Ergebnisse (Pallpan) deuten darauf hin, dass zwar die stationäre PV weniger in Anspruch genommen wurde, die PV insgesamt aber nicht abgenommen hat, weil das ambulante Angebot, insbesondere die SAPV stärker in Anspruch genommen wurde. Vermutlich auch wegen einer geringeren Inanspruchnahme hausärztlicher AAPV, weil diese durch die Pandemie und Digitalisierungsanforderungen stark anderweitig gebunden waren.

## Literatur

1. Michalski N, Reis M, Tetzlaff F, Nowossadeck E, Hoebel J (2022) German Index of Socioeconomic Deprivation (GISD). Daten für die Jahre 1998-2019. GISD Version v2022.0.2.  
<https://github.com/GISD-FG28/GISD/blob/master/Revisions/2022/Bund/Kreis/Kreis.csv>
2. Bundesinstitut für Bau-, Stadt- und Raumforschung (2022) INKAR online – Indikatoren und Karten zur Raum- und Stadtentwicklung. <https://www.inkar.de/>. Zugegriffen: 30. August 2022
3. Sterbefälle, Sterbeziffern Primärquelle: Statistisches Bundesamt, Todesursachenstatistik, Fortschreibung des Bevölkerungsstandes. <https://www.gbe-bund.de> (Recherche nach Themen: Gesundheitliche Lage - Sterblichkeit - Mortalität und Todesursachen)
4. Ditscheid B, Storch J, Krause M, Meyer I, Freytag A (2020) Leistungs- und Abrechnungsdatum in GKV-Routinedaten: Umgang mit zeitlichen Abweichungen. *Gesundheitswesen* 82:20–28.  
<https://doi.org/10.1055/a-1030-4223>
5. Kremeike K, Bausewein C, Freytag A et al. (2022) DNVF-Memorandum Versorgungsforschung im letzten Lebensjahr (DNVF Memorandum: Health Services Research in the Last Year of Life). *Gesundheitswesen*. <https://doi.org/10.1055/a-1889-4705>
6. GKV-Spitzenverband, Kassenärztliche Bundesvereinigung (2009) Vereinbarung über die qualifizierte ambulante Versorgung krebskranker Patienten „Onkologie-Vereinbarung“ (Anlage 7 zum Bundesmantelvertrag-Ärzte)
7. GKV-Spitzenverband Bundeseinheitliches Positionsnummernverzeichnis für Leistungen der spezialisierten ambulanten Palliativversorgung. (Stand: 30.06.2020)
8. GKV-Spitzenverband Bundeseinheitliches Positionsnummernverzeichnis für Leistungen der häuslichen Krankenpflege und Haushaltshilfe. (Stand 28.09.2021)
9. Charlson ME, Pompei P, Ales KL, MacKenzie CR (1987) A new method of classifying prognostic comorbidity in longitudinal studies: development and validation. *J Chronic Dis* 40:373–383.  
[https://doi.org/10.1016/0021-9681\(87\)90171-8](https://doi.org/10.1016/0021-9681(87)90171-8)
10. Gasparini A (2018) comorbidity: An R package for computing comorbidity scores. *JOSS* 3:648.  
<https://doi.org/10.21105/joss.00648>
11. Lumley T (2021) Survey. Analysis of Complex Survey Samples. R Package Version 4.1-1
12. Krause M, Ditscheid B, Lehmann T et al. (2021) Effectiveness of two types of palliative home care in cancer and non-cancer patients: A retrospective population-based study using claims data. *Palliative medicine* 35:1158–1169. <https://doi.org/10.1177/02692163211013666>
13. Just J, Schmitz M-T, Grabenhorst U, Joist T, Horn K, Weckbecker K (2022) Specialized outpatient palliative care—clinical course and predictors for living at home until death. *Dtsch Arztebl Int*:327–332. <https://doi.org/10.3238/arztebl.m2022.0172>
14. Rusche H, Kreimendahl F, Huenges B, Becka D, Rychlik R (2016) Medizinische Versorgung und Kosten im letzten Lebensjahr (Medical care and costs in the last year of life – propensity score matching of AAPV and SAPV insurants). *Dtsch med Wochenschr* 141:e203-e212.  
<https://doi.org/10.1055/s-0042-114481>
15. Murtagh FE, Bausewein C, Verne J, Groeneveld EI, Kaloki YE, Higginson IJ (2014) How many people need palliative care? A study developing and comparing methods for population-based estimates. *Palliative medicine* 28:49–58. <https://doi.org/10.1177/0269216313489367>
16. Muller CJ, MacLehose RF (2014) Estimating predicted probabilities from logistic regression: different methods correspond to different target populations. *Int J Epidemiol* 43:962–970.  
<https://doi.org/10.1093/ije/dyu029>

17. Ditscheid B, Krause M, Lehmann T et al. (2020) Palliativversorgung am Lebensende in Deutschland : Inanspruchnahme und regionale Verteilung (Palliative care at the end of life in Germany : Utilization and regional distribution). Bundesgesundheitsblatt - Gesundheitsforschung - Gesundheitsschutz 63:1502–1510. <https://doi.org/10.1007/s00103-020-03240-6>
18. Meissner F, Ditscheid B, & Freytag A (2022) Alters- und Geschlechtsstandardisierung bei kleinräumigen GKV-Routinedatenanalysen von verstorbenen Versicherten. Vortrag auf dem virtuellen AGENS Methodenworkshop. Universitätsklinikum Frankfurt a.M., Deutschland.
19. Radbruch L, Andersohn F, Walker J (2015) Palliativversorgung - Modul 3. Überversorgung kurativ – Unterversorgung palliativ? Analyse ausgewählter Behandlungen am Lebensende. Faktencheck Gesundheit
20. Hemmerling M, Stahmeyer JT, Schütte S, van Baal K, Stiel S (2022) Besonders qualifizierte und koordinierte palliativmedizinische Versorgung. Patientenlientel und Effekte auf die ambulante Palliativversorgung. Z Allg Med 98:337-344. <https://doi.org/10.53180/zfa.2022.0337-0344>
21. Gothe H, Brinkmann C, Schmedt N, Walker J, Ohlmeier C (2022) Is there an unmet medical need for palliative care services in Germany? Incidence, prevalence, and 1-year all-cause mortality of palliative care sensitive conditions: real-world evidence based on German claims data. J Public Health (Berl.) 30:711–720. <https://doi.org/10.1007/s10389-020-01319-7>
22. van Baal K, Stiel S, Hemmerling M et al. (2021) Ambulante Palliativversorgung in Niedersachsen – regionale Unterschiede in der Versorgung von Menschen am Lebensende anhand von Qualitätsindikatoren. Versorgungsatlas-Bericht, Nr. 21/04., Berlin
23. van Baal K, Schrader S, Schneider N et al. (2020) Quality indicators for the evaluation of end-of-life care in Germany - a retrospective cross-sectional analysis of statutory health insurance data. BMC Palliative Care 19:187. <https://doi.org/10.1186/s12904-020-00679-x>
